# Supplementary material for: Optimized synthesis of functional organosilicon monomers and polymers exploiting new types of CuAAC recoverable heterogeneous catalysts
Source: Royal Society of Chemistry journal article supplement (doi:10.1039/d3re00532a), 2023-10-27
Supplement: d3re00532a1.pdf [file d3re00532a1.pdf]

Supporting Information

# Optimized synthesis of functional organosilicon monomers and polymers exploiting new type of CuAAC recoverable heterogeneous catalyst

*Kseniya A. Bezlepkina,<sup>a,c</sup> Irina I. Belikova,<sup>a,b</sup> Vasilissa A. Aristova,<sup>a,b</sup> Kseniia S. Klokova,<sup>a</sup> Sofia  
N. Ardabevskaia,<sup>a,c</sup> Alexander Yu Pereyaslavtsev,<sup>d</sup> Dmitry A. Migulin<sup>a</sup>, Sergey A. Milenin,<sup>a,c\*</sup>*

a- Enikolopov Institute of Synthetic Polymeric Materials of Russian Academy of Sciences,  
117393, Moscow, Russian Federation

b- Mendeleev University of Chemical Technology of Russia, 125047, Moscow, Russia

c - Research Laboratory of New Silicone Materials and Technologies, Tula State Lev Tolstoy  
Pedagogical University, 300026 Tula, Russia

d- A. N. Nesmeyanov Institute of Organoelement Compounds, RAS, 119991, Moscow, Russia

## Table of contents

|                                                                                                                                                      |    |
|------------------------------------------------------------------------------------------------------------------------------------------------------|----|
| 1. Synthesis of hyperbranched poly[3-(2-Aminoethylamino)propyl]methoxysiloxane poly(en-propyl-methoxysiloxane).....                                  | 3  |
| 2. Synthesis of Sodiumoxy-[3-(2-Aminoethylamino)propyl]dimethoxysilane.....                                                                          | 3  |
| 3. Synthesis of hyperbranched poly[3-(2-Aminoethylamino)propyl]methoxysiloxane poly(en-propyl-siloxane).....                                         | 4  |
| 4. Synthesis of hyperbranched poly(3-(4-((dimethylamino)methyl)-1H-1,2,3-triazol-1-yl)propyl)ethoxysiloxane - poly(DMA-1,2,3-triazole-siloxane)..... | 6  |
| 5. NMR spectra and GPC curves of functional siloxanes.....                                                                                           | 11 |
| 7. Preparation of Functional carbosilane dendrimer.....                                                                                              | 26 |
| 8. Cell culture and cytotoxicity assay.....                                                                                                          | 30 |
| 9. References.....                                                                                                                                   | 32 |

## 1. Synthesis of hyperbranched poly[3-(2-Aminoethylamino)propyl]methoxysiloxane poly(en-propyl-methoxysiloxane)

Hyperbranched poly[3-(2-Aminoethylamino)propyl]methoxysiloxane was synthesized in the process of heterofunctional polycondensation of the corresponding AB<sub>2</sub>-type Sodiumoxy-[3-(2-Aminoethylamino)propyl]dimethoxysilane monomer according to the procedure previously described in <sup>1</sup>

## 2. Synthesis of Sodiumoxy-[3-(2-Aminoethylamino)propyl]dimethoxysilane

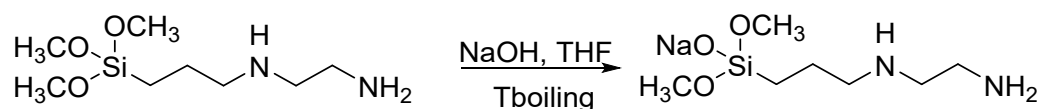

<sup>1</sup>H NMR (300 MHz, THF)  $\delta$ : 2,81-2,73 ppm (m, 2H, -CH<sub>2</sub>-NH<sub>2</sub>), 2,66-2,62 ppm (m, 2H, -NH-CH<sub>2</sub>-), 2,66-2,62 ppm (m, 2H, -CH<sub>2</sub>-NH-), 1,73-1,63 ppm (q, 2H, -CH<sub>2</sub>-CH<sub>2</sub>-NH-, J= 7 Hz), 0,52 ppm (t, 2H, -Si-CH<sub>2</sub>-, J= 7,6 Hz), 3,45 ppm (s, 6H, CH<sub>3</sub>O-), 1,38 ppm (t, 2H, -NH<sub>2</sub>, J= 6,5 Hz), 1,63-1,54 ppm (q, 1H, -NH-, J= 7 Hz); <sup>13</sup>C NMR (THF)  $\delta$ : 9,25 ppm (-Si-CH<sub>2</sub>-CH<sub>2</sub>-), 24,54 ppm (-Si-CH<sub>2</sub>-CH<sub>2</sub>-), 52,57 ppm or 52,54 ppm (-CH<sub>2</sub>-CH<sub>2</sub>-NH-), 52,57 ppm or 52,54 ppm (-NH-CH<sub>2</sub>-CH<sub>2</sub>-), 41,64 ppm (CH<sub>2</sub>-CH<sub>2</sub>-NH<sub>2</sub>); <sup>29</sup>Si (THF),  $\delta$ : -44,46 ppm; <sup>15</sup>N (THF),  $\delta$ : 34 ppm (-NH-), 16 ppm (-NH<sub>2</sub>); <sup>23</sup>Na (THF) 13 ppm; HRMS calcd for C<sub>7</sub>H<sub>19</sub>N<sub>2</sub>NaO<sub>3</sub>Si: 231.1135; found: [M+nNa] = 231.1132.

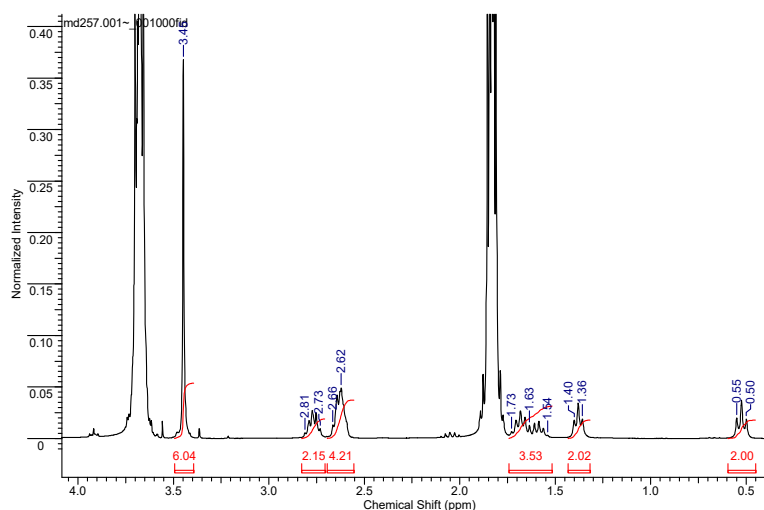

Figure S1. <sup>1</sup>H NMR Spectral data of Sodiumoxy-[3-(2-Aminoethylamino)propyl]dimethoxysilane

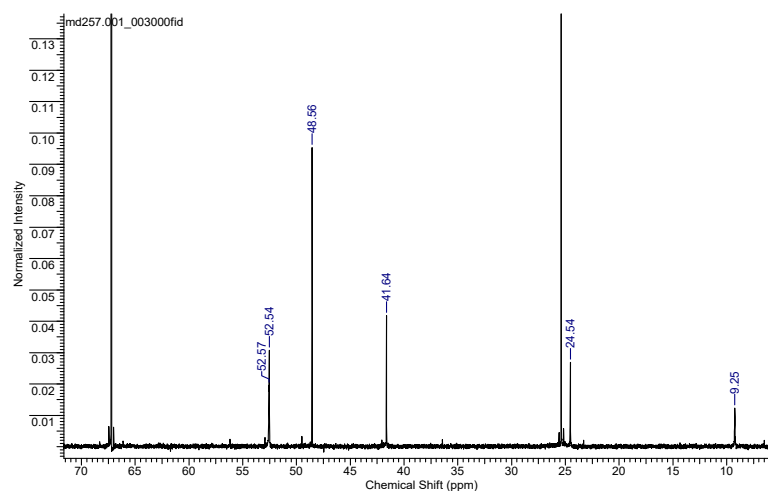

Figure S2.  $^{13}\text{C}$  NMR Spectral data of Sodiumoxy-[3-(2-Aminoethylamino)propyl]dimethoxysilane

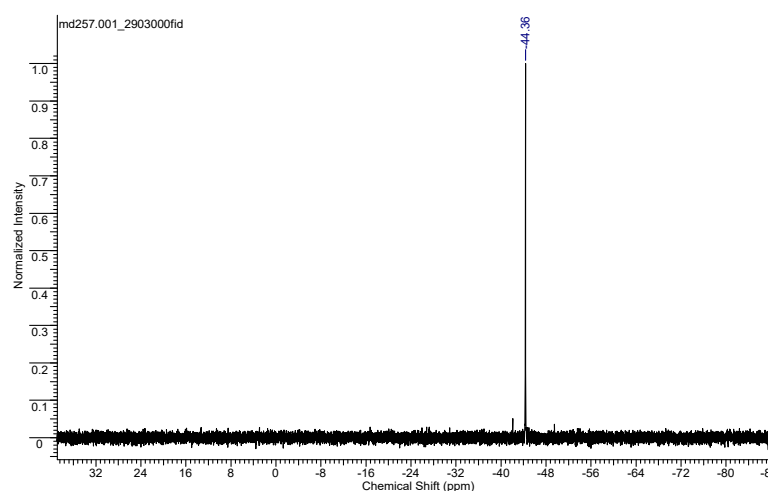

Figure S3.  $^{29}\text{Si}$  NMR Spectral data of Sodiumoxy-[3-(2-Aminoethylamino)propyl]dimethoxysilane

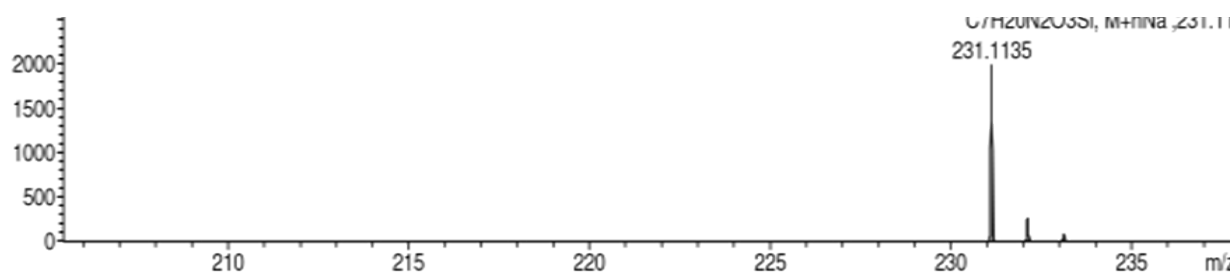

Figure S4. Mass spectra of Sodiumoxy-[3-(2-Aminoethylamino)propyl]dimethoxysilane

### 3. Synthesis of hyperbranched poly[3-(2-Aminoethylamino)propyl]methoxysiloxane poly(en-propyl-siloxane)

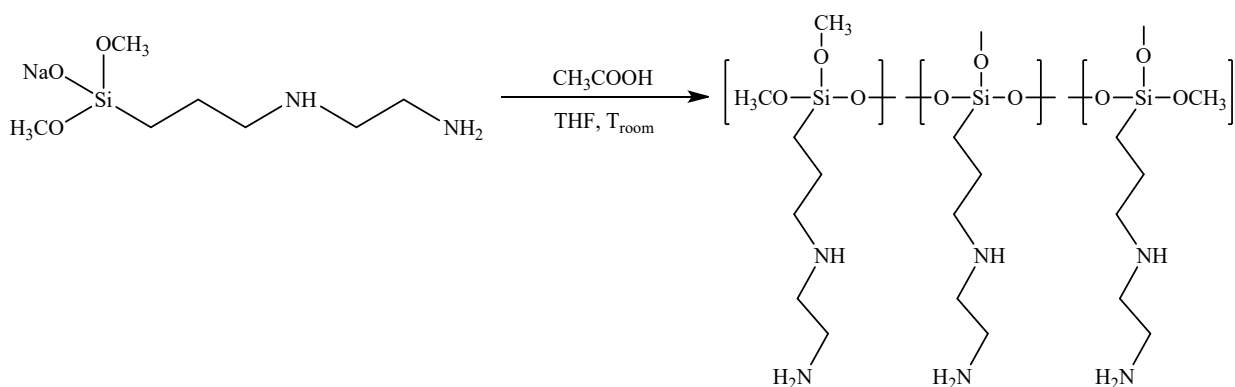

$^1\text{H}$  NMR (300 MHz, THF)  $\delta$ : 2,84-2,73 ppm (m, 2H,  $-\text{CH}_2-\text{NH}_2$ ), 2,70-2,54 ppm (m, 2H,  $-\text{NH}-\text{CH}_2-$ ), 2,70-2,54 ppm (m, 2H,  $-\text{CH}_2-\text{NH}-$ ), 1,66-1,50 ppm (q, 2H,  $-\text{CH}_2-\text{CH}_2-\text{NH}-$ ), 0,72-0,57 ppm (m, 2H,  $-\text{Si}-\text{CH}_2-$ ), 3,58-3,48 ppm (m, 6H,  $\text{CH}_3\text{O}-$ ), 1,20-1,06 ppm (m, 2H,  $-\text{NH}_2$ ), 1,20-1,06 ppm (m, 1H,  $-\text{NH}-$ );  $^{29}\text{Si}$  (THF),  $\delta$ : 49,18-49,93 ppm (m, R-Si(OCH<sub>3</sub>)<sub>2</sub>O-), 56,45-59,16 (m, R-Si(OCH<sub>3</sub>)(O-)<sub>2</sub>), 63,75-68,62 (m, R-Si(O-)<sub>3</sub>).

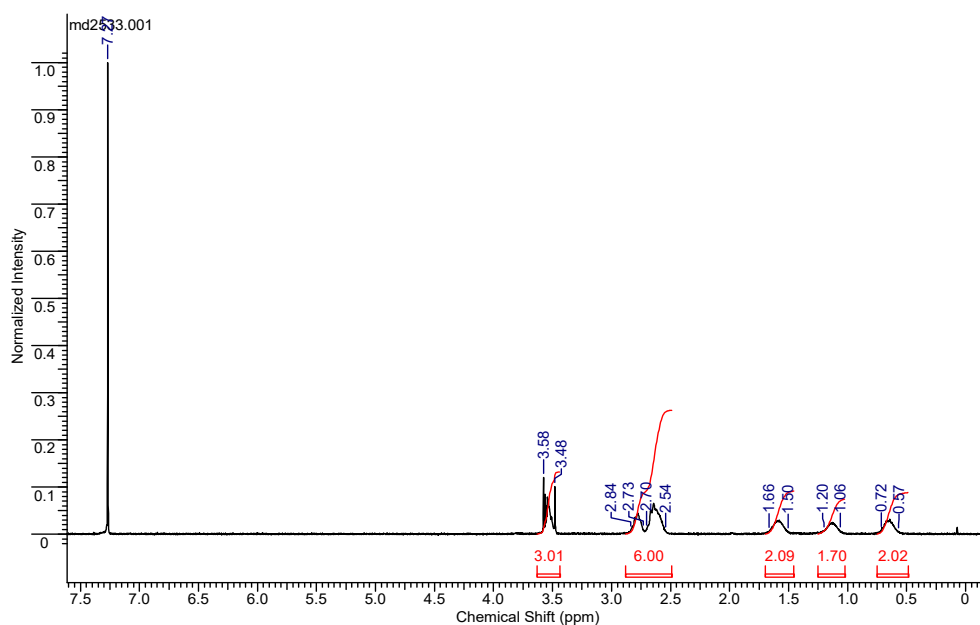

Figure S5.  $^1\text{H}$  NMR Spectral data of poly(en-propyl-siloxane)

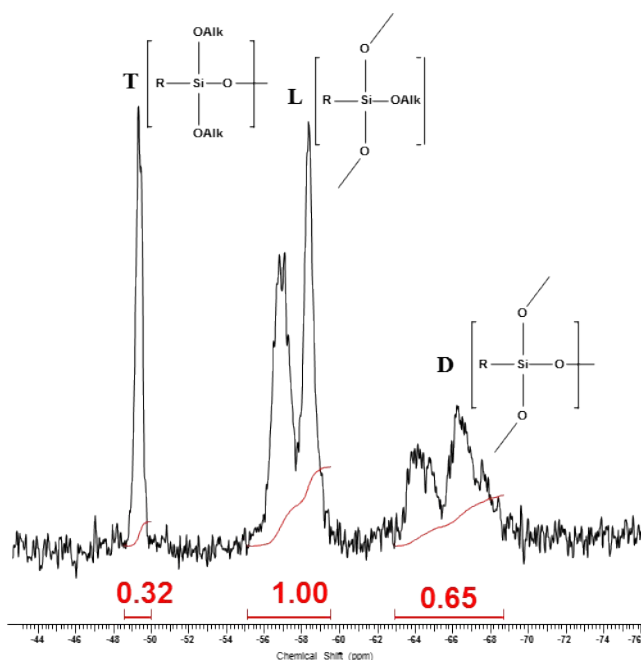

Figure S6.  $^{29}\text{Si}$  NMR Spectral data of  $^1\text{H}$  NMR Spectral data of poly(en-propyl-siloxane) with the addition of paramagnetic relaxation agent Chromium (III) Acetylacetonate

#### 4. Synthesis of hyperbranched poly(3-(4-((dimethylamino)methyl)-1H-1,2,3-triazol-1-yl)propyl)ethoxysiloxane - poly(DMA-1,2,3-triazole-siloxane)

Hyperbranched DMA-1,2,3-triazole-siloxane was synthesized according to the procedure previously described in <sup>2</sup>.

$^1\text{H}$  NMR (300 MHz,  $\text{CDCl}_3$ )  $\delta$  7.7-7.4 (m, 1H), 4.3-4.1 (m, 2H), 3.7- 3.5 (m, 1.5H), 3.6 -3.3 (m, 2H), 2.1 (br.s, 3H), 1.9 - 1.7 (m, 2H), 1.0-0.8 (m, 2H), 0.6-0.3 (m, 2H);  $^{13}\text{C}$  NMR (75 MHz,  $\text{CDCl}_3$ )  $\delta$  144.4, 122.5, 58.0, 53.9, 51.9, 44.8, 25.2, 23.8, 17.8, 9.9, 9.2, 8.7, 8.0;  $^{29}\text{Si}$  NMR (60 MHz,  $\text{CDCl}_3$ )  $\delta$ : (-53.6) - (-54.5) (R-Si(OCH<sub>2</sub>CH<sub>3</sub>)<sub>2</sub>O<sub>0.5</sub>), (-59.0) – (-62.6) (R-Si(OCH<sub>2</sub>CH<sub>3</sub>)O), (-64.0) –(-70.0) (R-SiO<sub>1.5</sub>). MALDI:  $M_w$ =2348 g/mol,  $M_w/M_n$ =1.1.

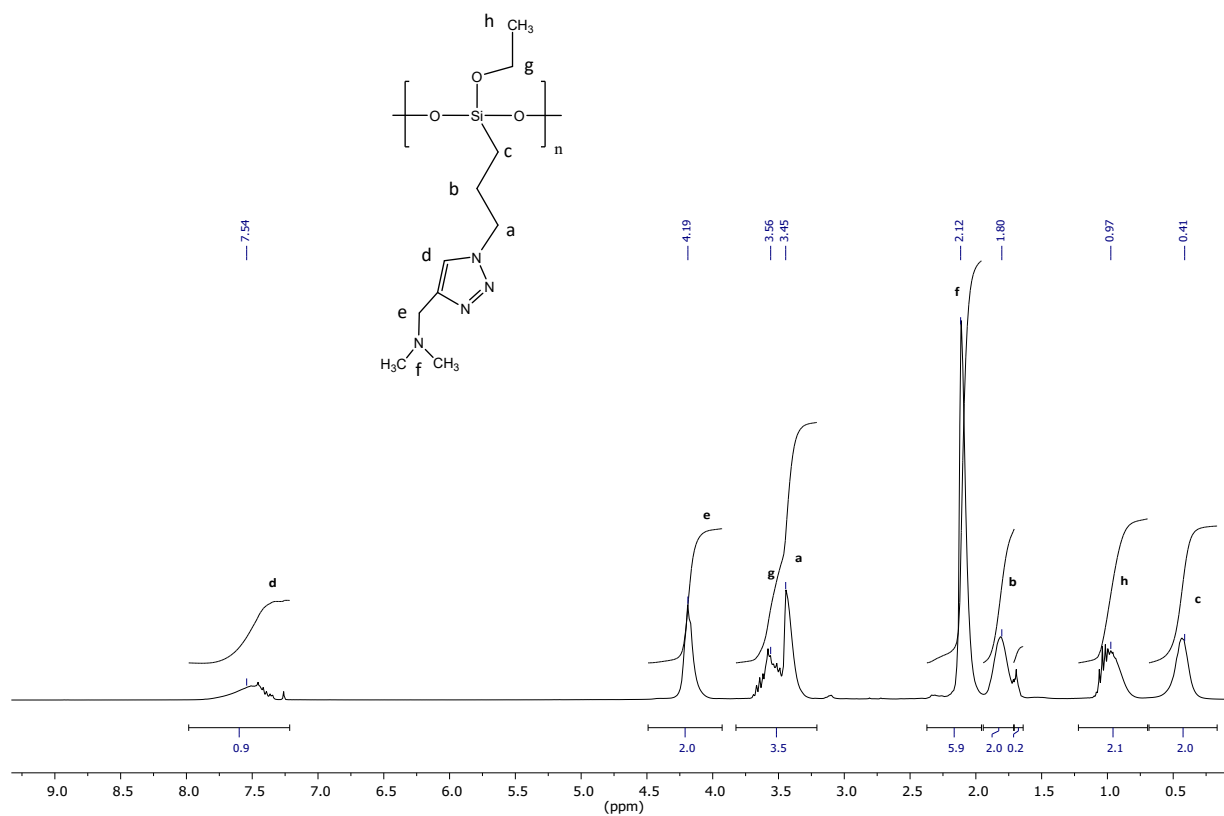

Figure S7.  $^1\text{H}$  NMR Spectra of poly(DMA-1,2,3-triazole-siloxane)

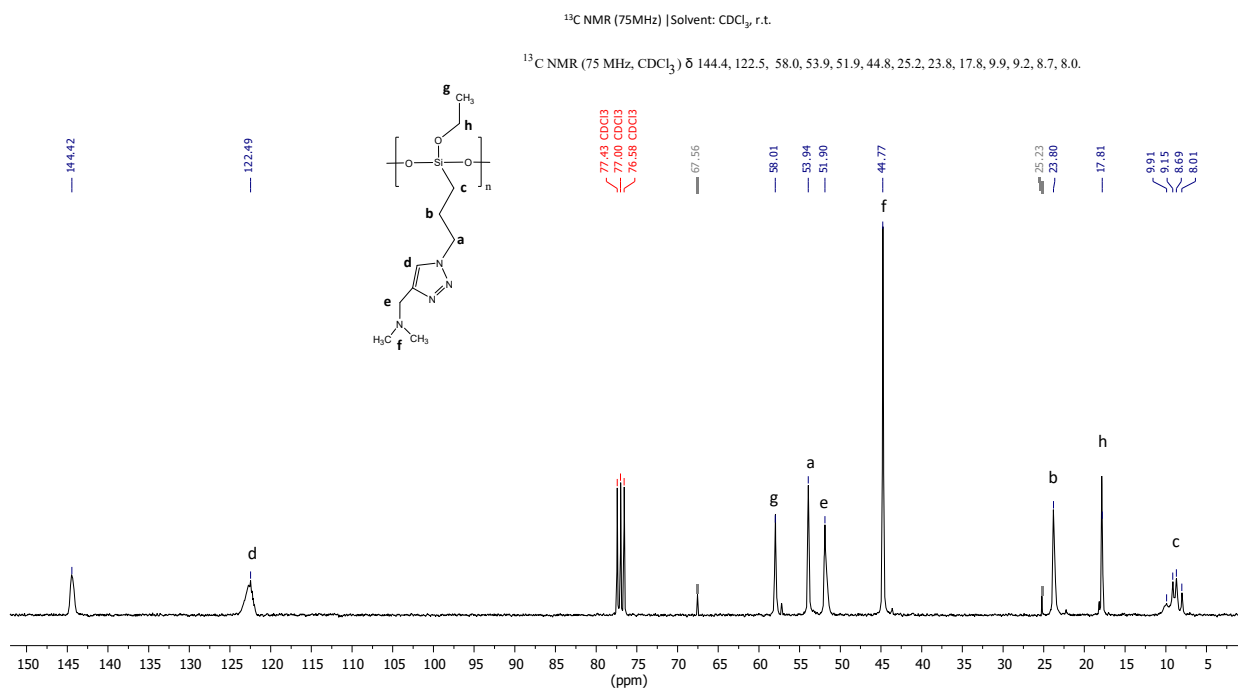

Figure S8.  $^{13}\text{C}$  NMR Spectra of poly(DMA-1,2,3-triazole-siloxane)

$^{13}\text{C}$  NMR (75MHz) APT | Solvent:  $\text{CDCl}_3$ , r.t.

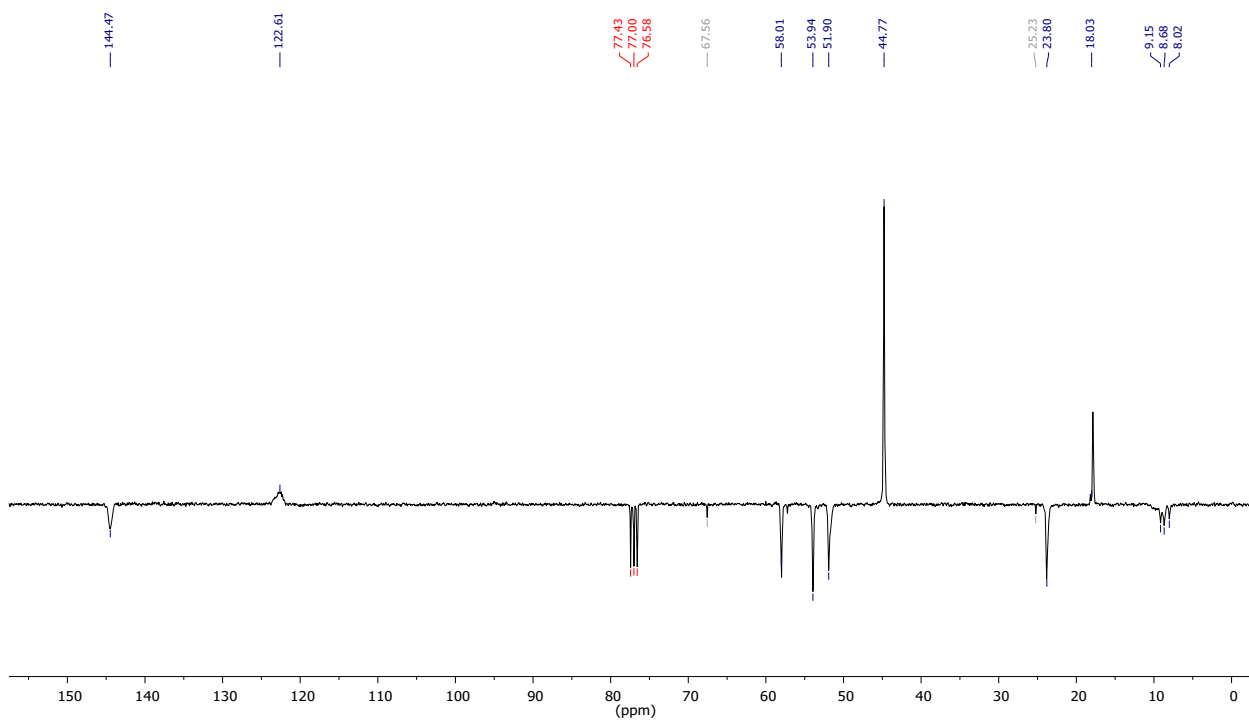

Figure S9.  $^{13}\text{C}$  NMR APT Spectra of poly(DMA-1,2,3-triazole-siloxane)

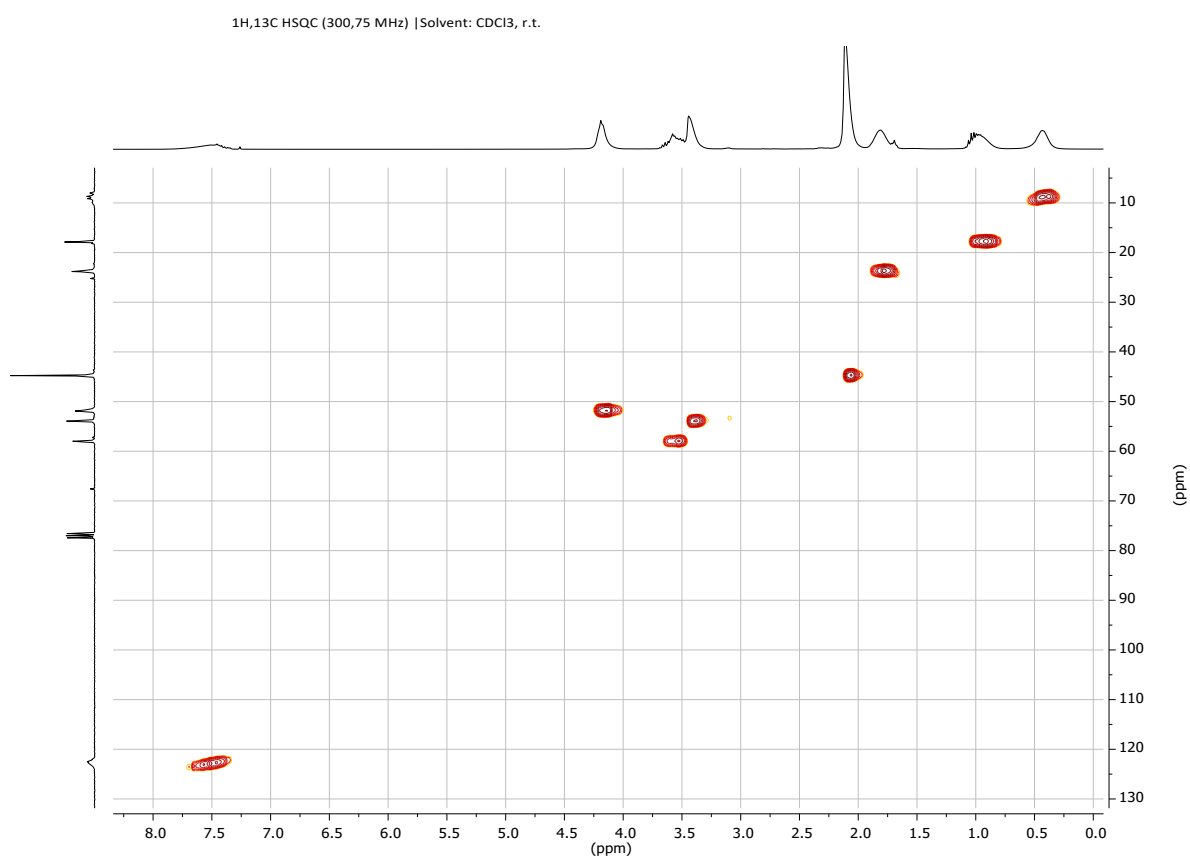

Figure S10.  $^1\text{H}$ ,  $^{13}\text{C}$  NMR HSQC Spectra of poly(DMA-1,2,3-triazole-siloxane)



MHz) | Solvent: CDCl<sub>3</sub>, r.t.

<sup>29</sup>Si NMR (60 MHz, CDCl<sub>3</sub>) δ: (-53.6) - (-54.5), (-59) - (-62.6), (-64) - (-70).

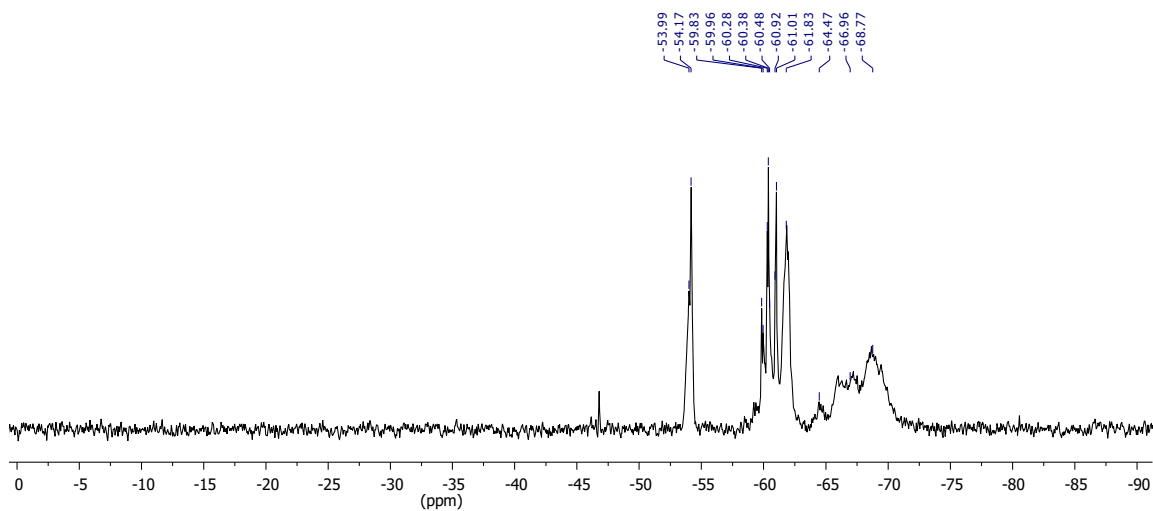

Figure S11. <sup>29</sup>Si NMR Spectra of DMA-1,2,3-triazole-siloxane

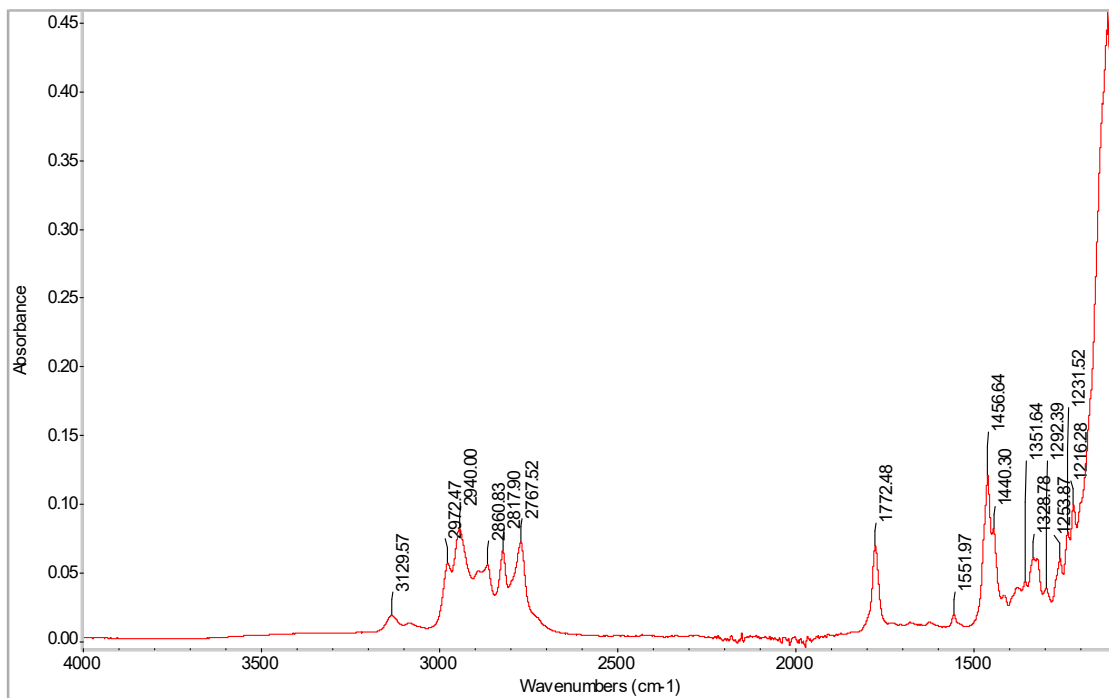

Figure S12. FTIR Spectra of poly(DMA-1,2,3-triazole-siloxane)

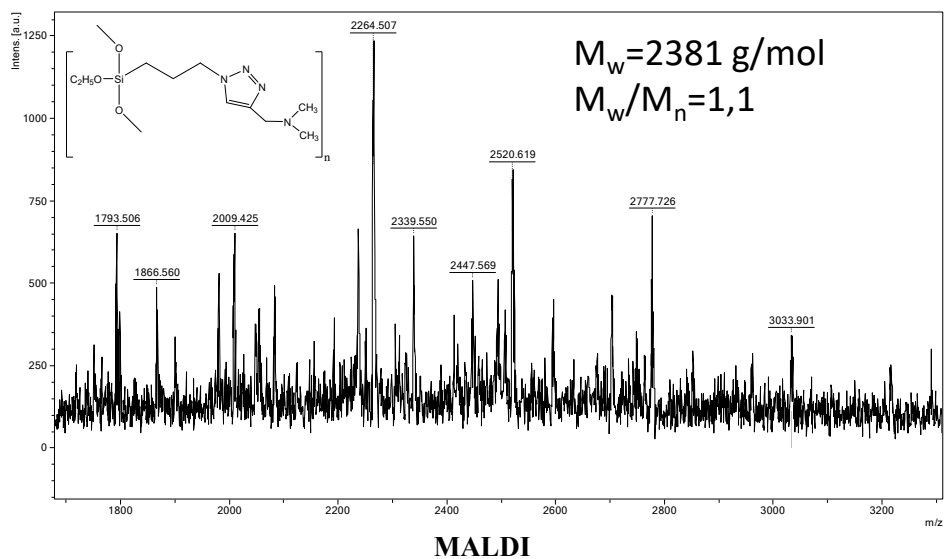

Figure S13. MALDI spectra of poly(DMA-1,2,3-triazole-siloxane)

## 5. NMR spectra and GPC curves of functional siloxanes

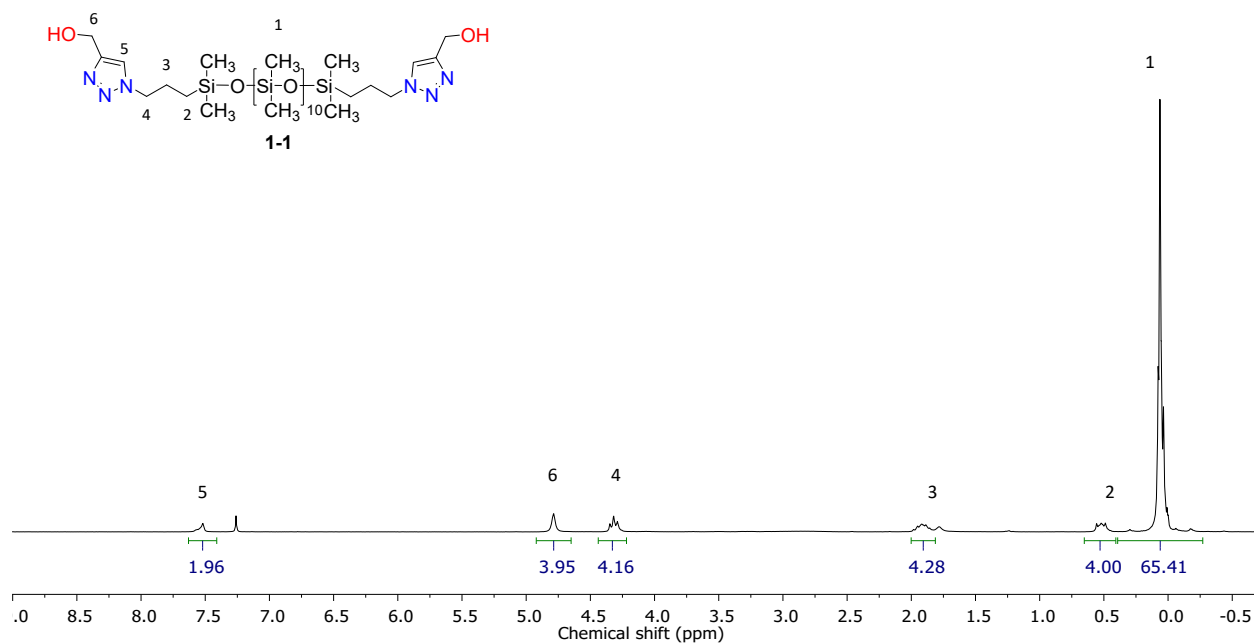

Figure S14.  $^1\text{H}$  NMR spectrum of 1-1

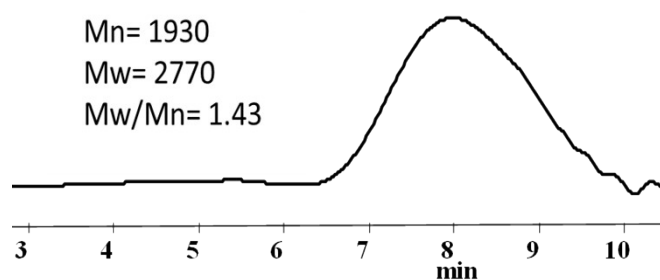

Figure S15. GPC curve of 1-1

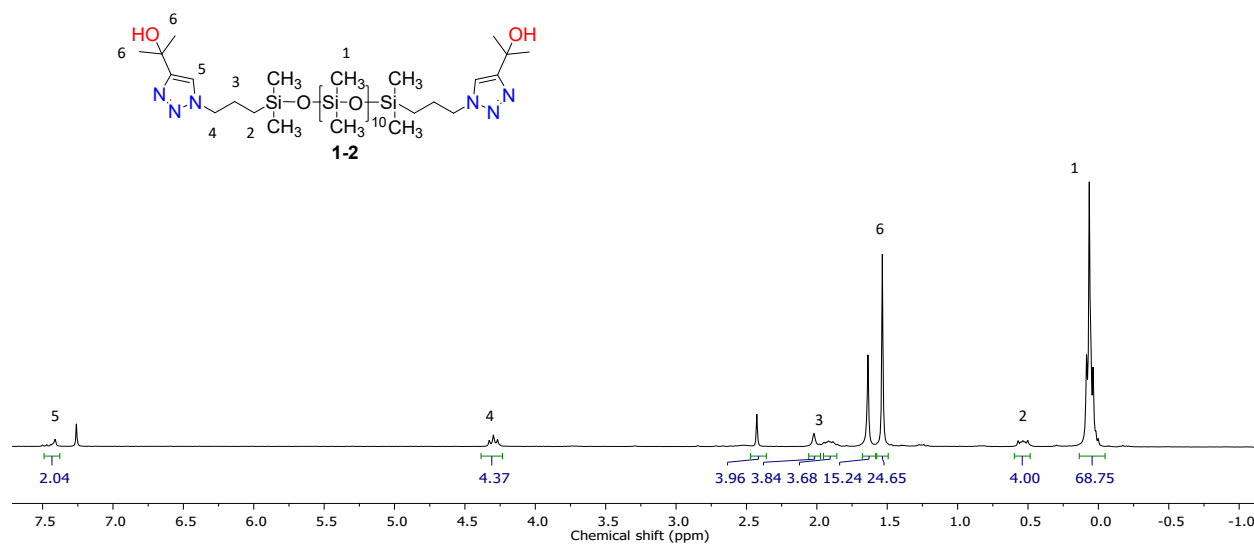

Figure S16.  $^1\text{H}$  NMR spectrum of 1-2

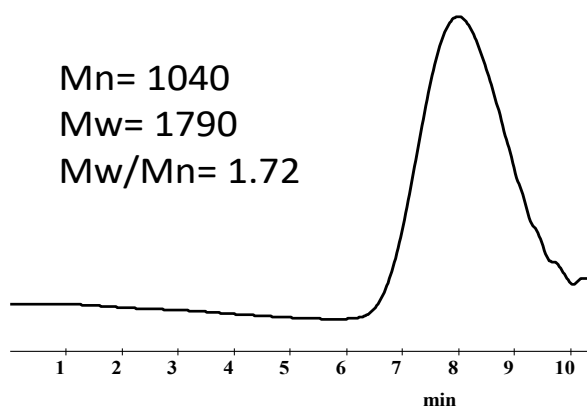

Figure S17. GPC curve of 1-2

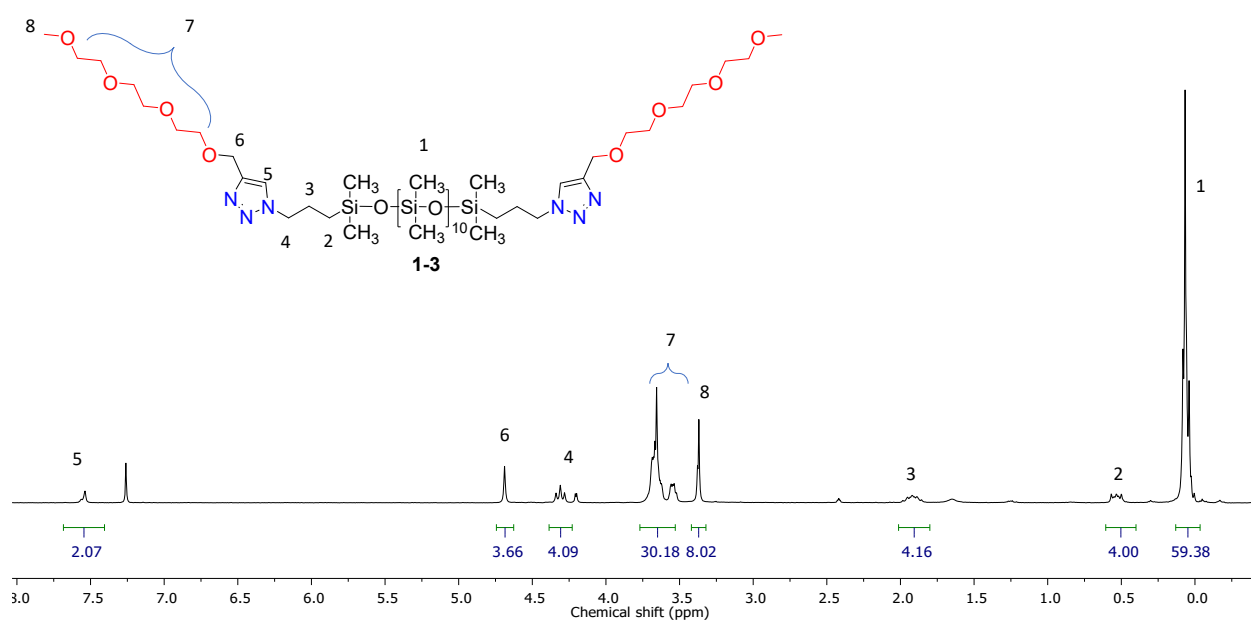

Figure S18. <sup>1</sup>H NMR spectrum of 1-3

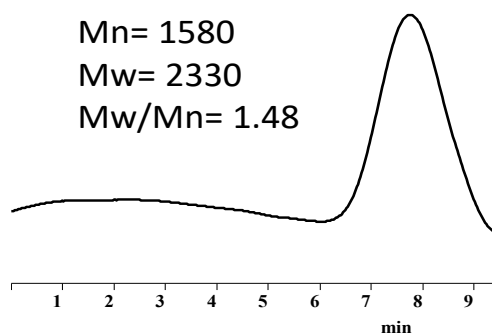

Figure S19. GPC curve of 1-3

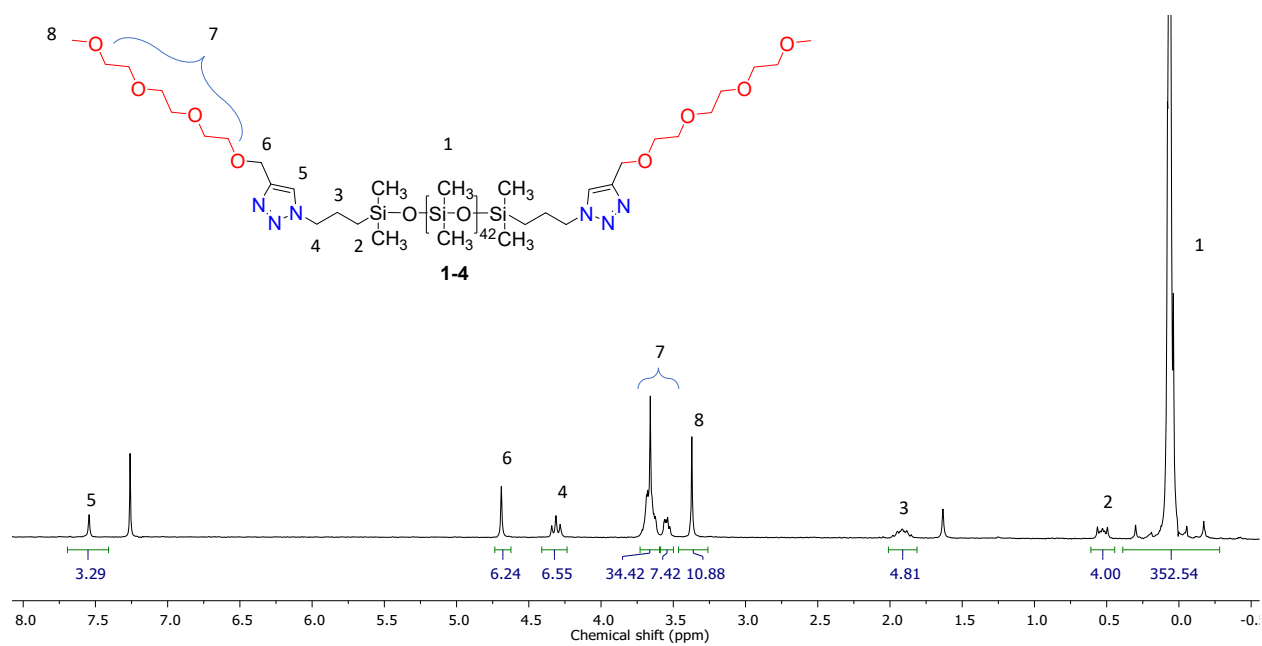

Figure S20. <sup>1</sup>H NMR spectrum of 1-4

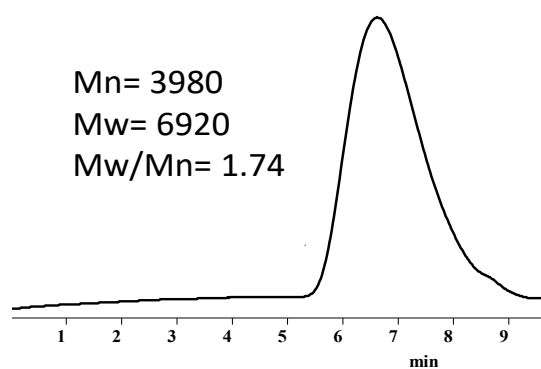

Figure S21. GPC curve of 1-4

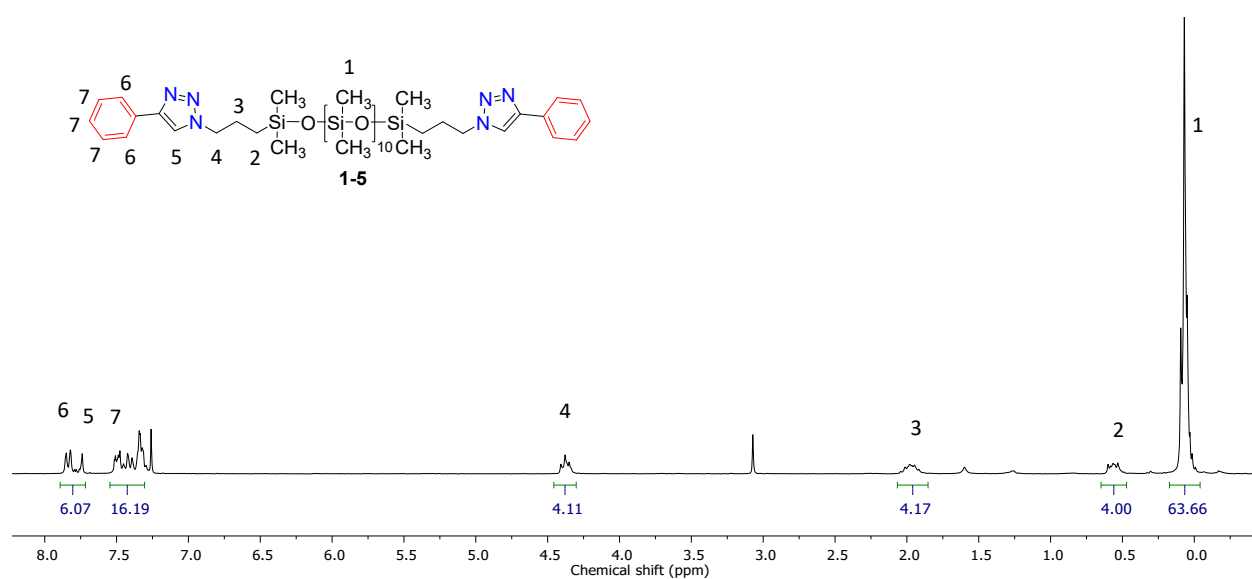

Figure S22. <sup>1</sup>H NMR spectrum of 1-5

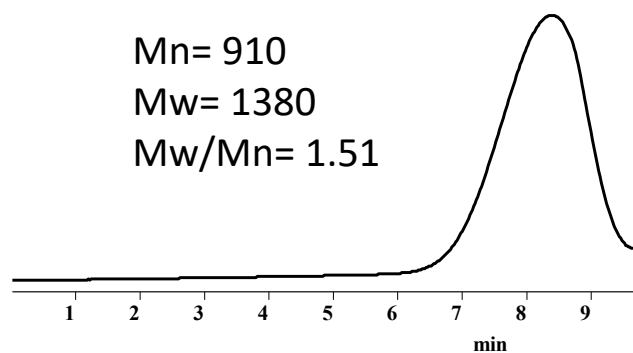

Figure S23. GPC curve of 1-5

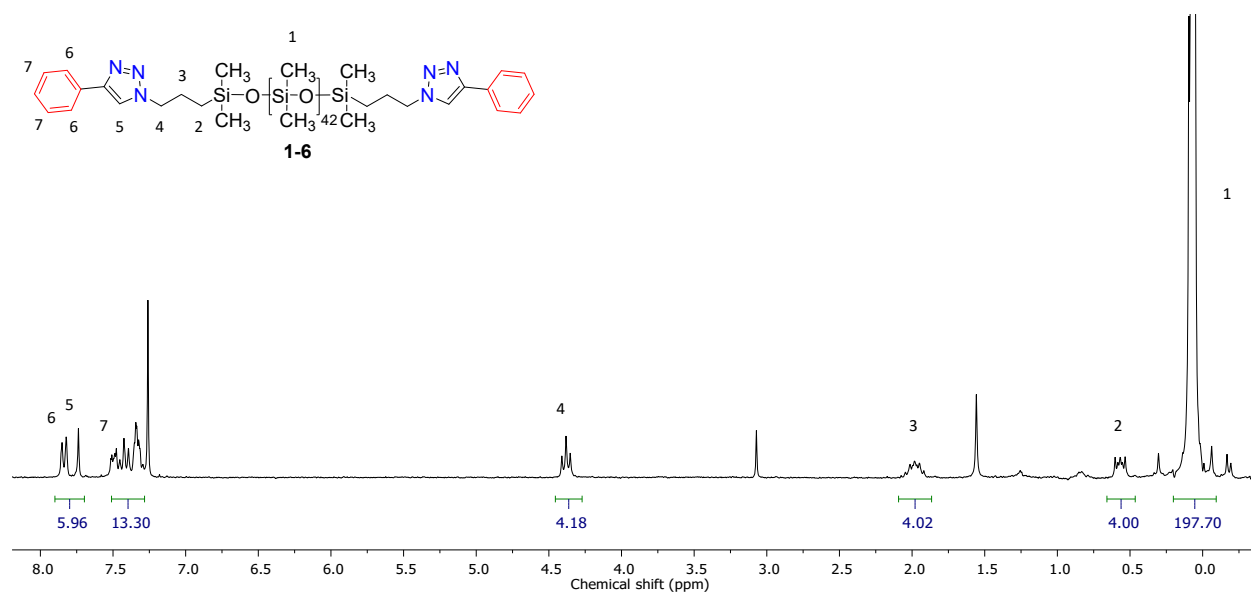

Figure S24.  $^1\text{H}$  NMR spectrum of 1-6

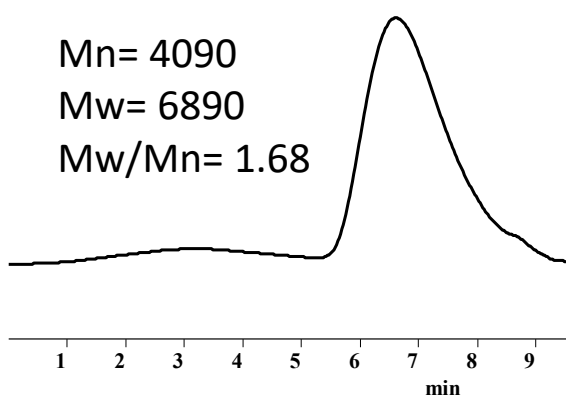

Figure S25. GPC curve of 1-6

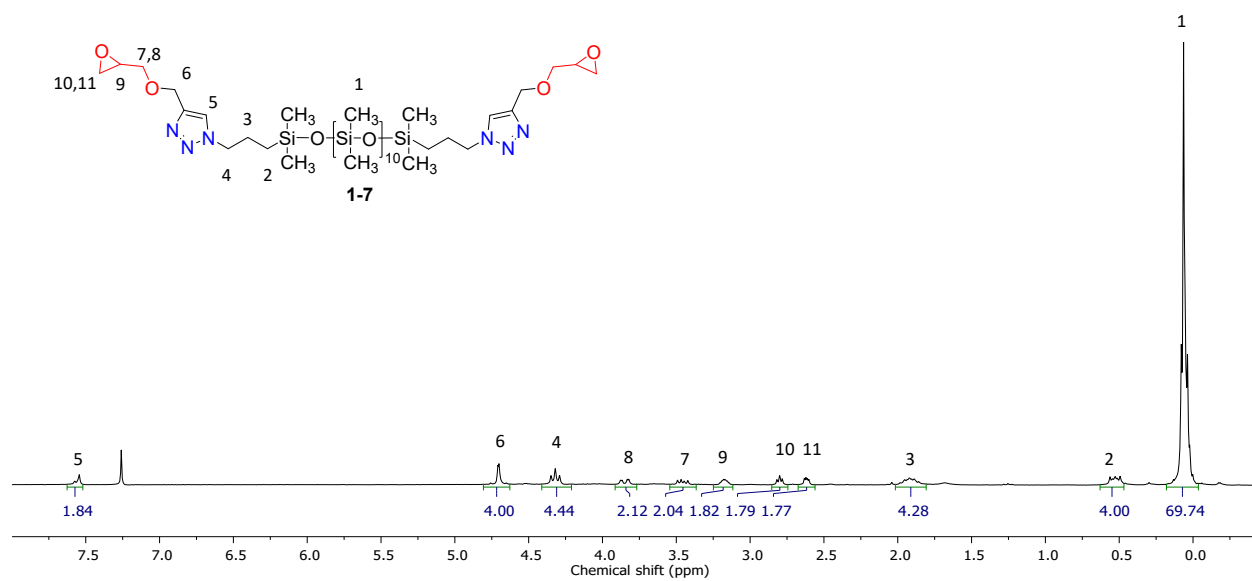

Figure S26. <sup>1</sup>H NMR spectrum of 1-7

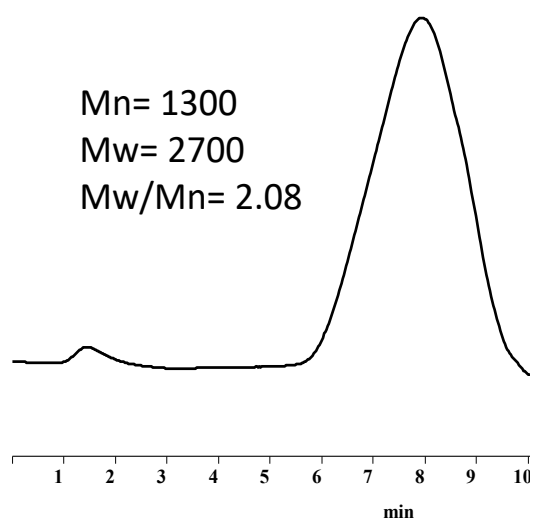

Figure S27. GPC curve of 1-7

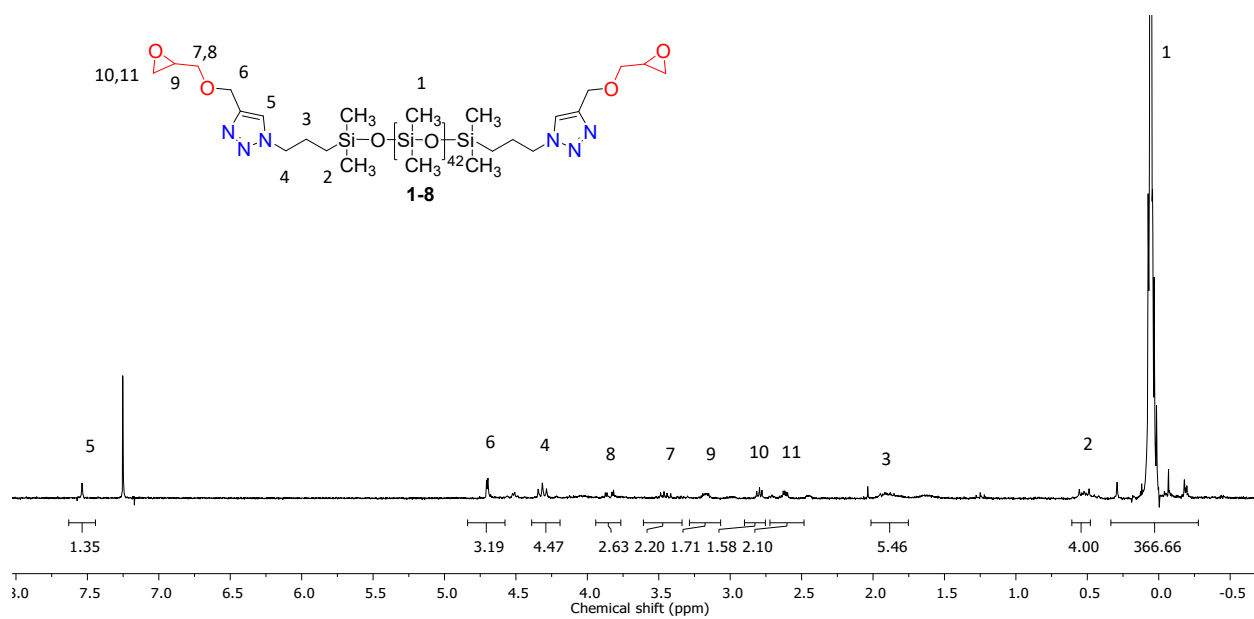

Figure S28.  $^1\text{H}$  NMR spectrum of 1-8

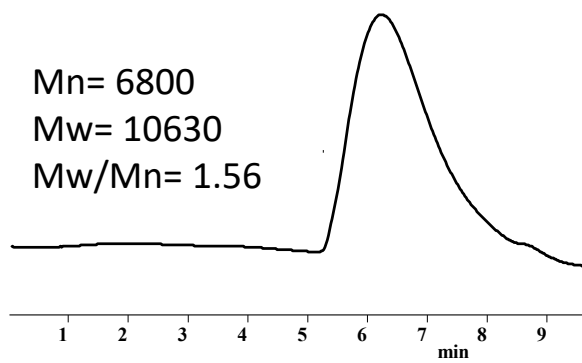

Figure S29. GPC curve of 1-8



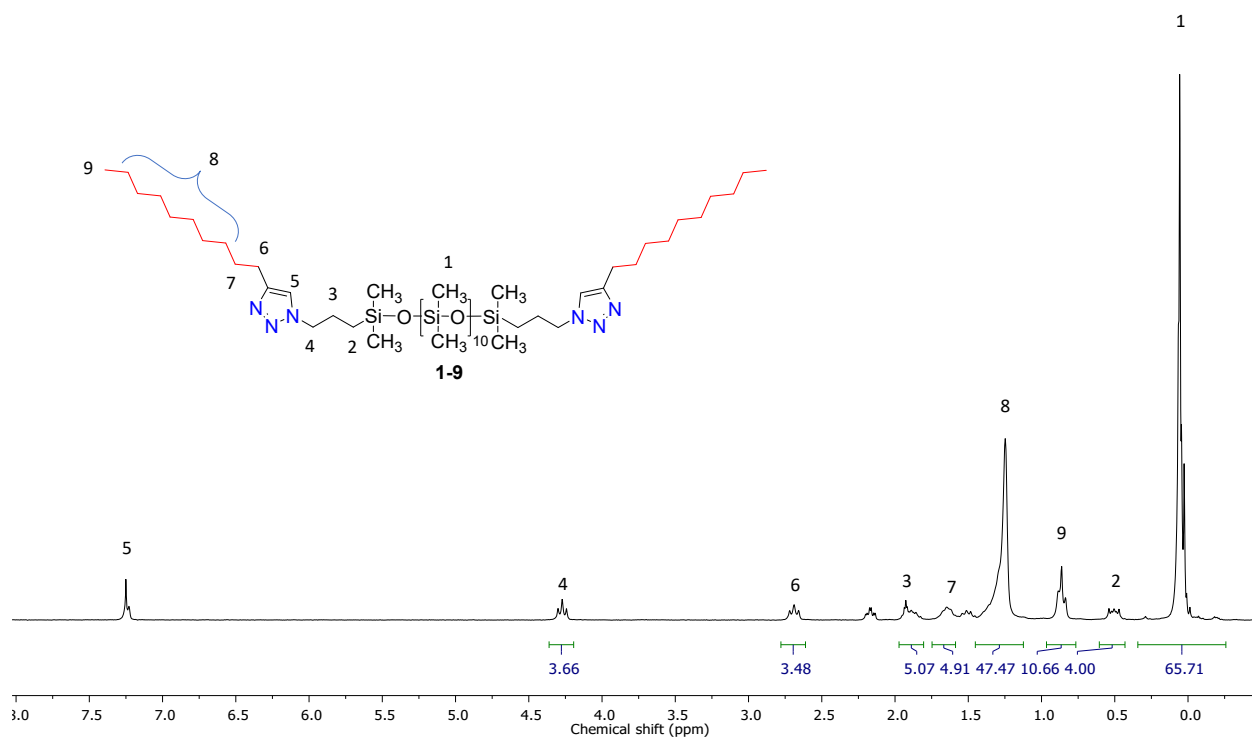

Figure S30.  $^1\text{H}$  NMR spectrum of 1-9

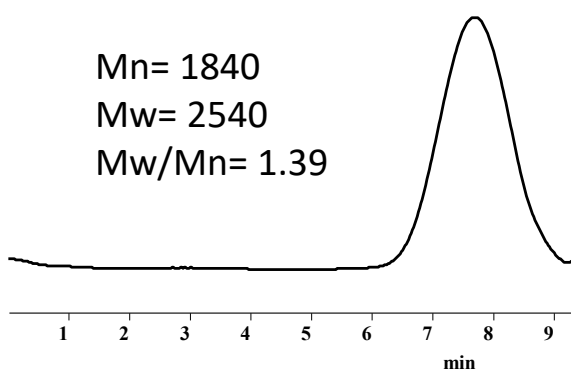

Figure S31. GPC curve of 1-9

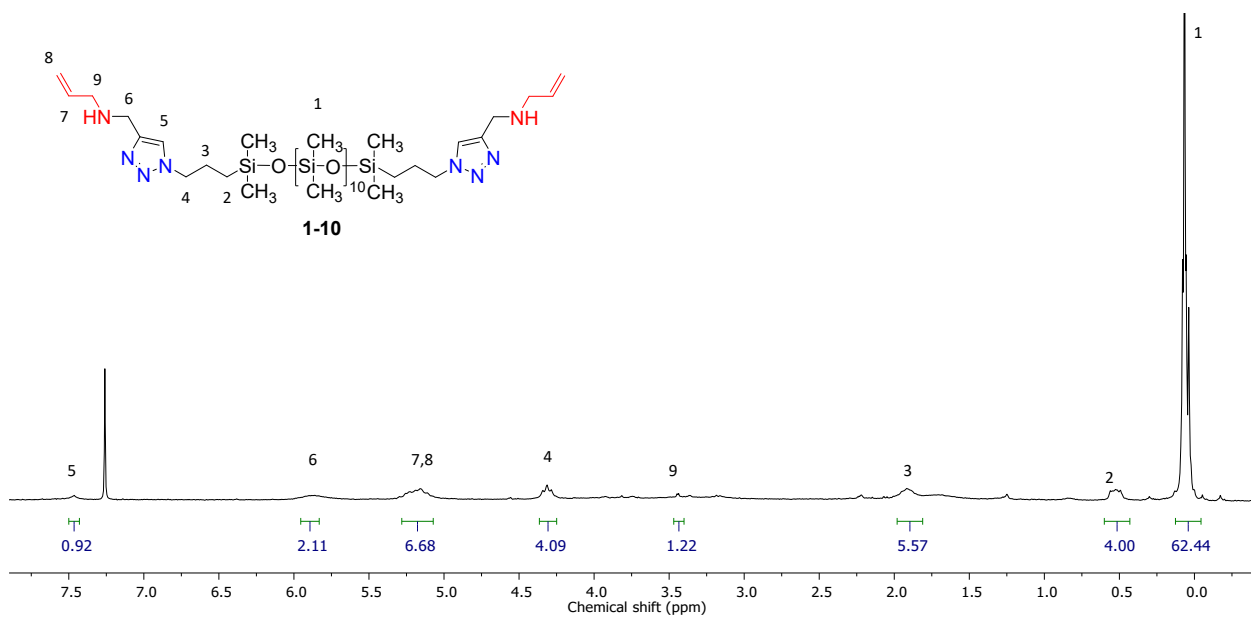

Figure S32. <sup>1</sup>H NMR spectrum of 1-10

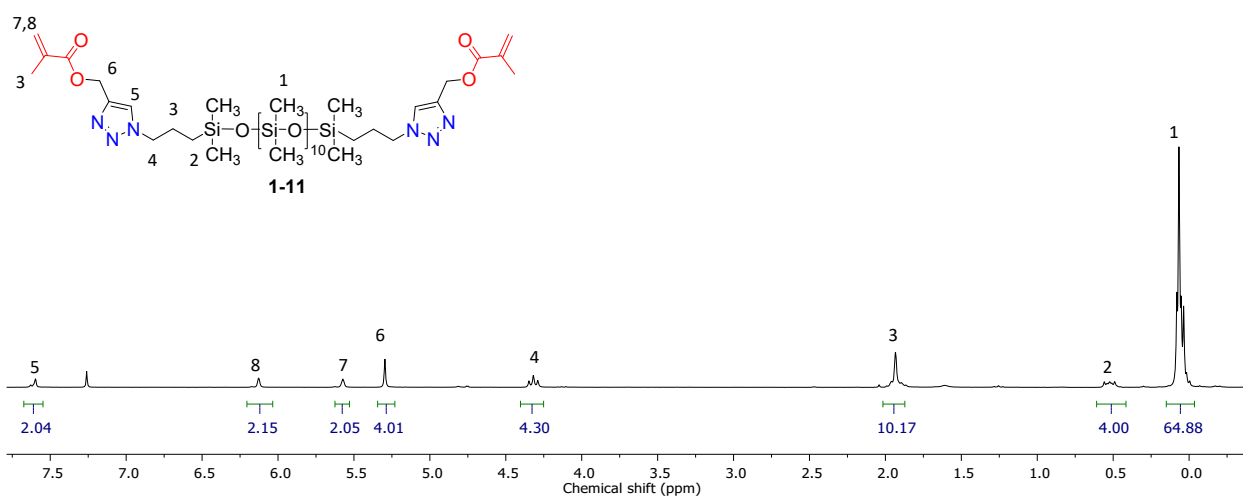

Figure S33. <sup>1</sup>H NMR spectrum of 1-11

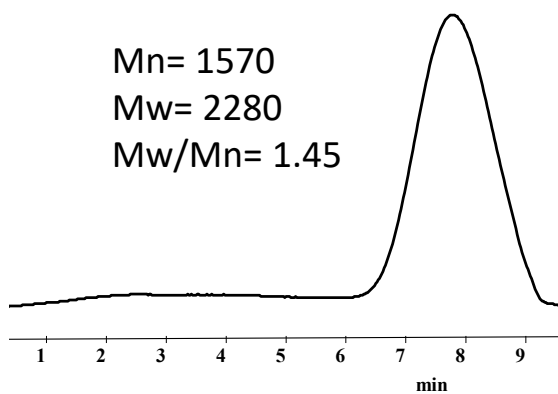

Figure S34. GPC curve of 1-11

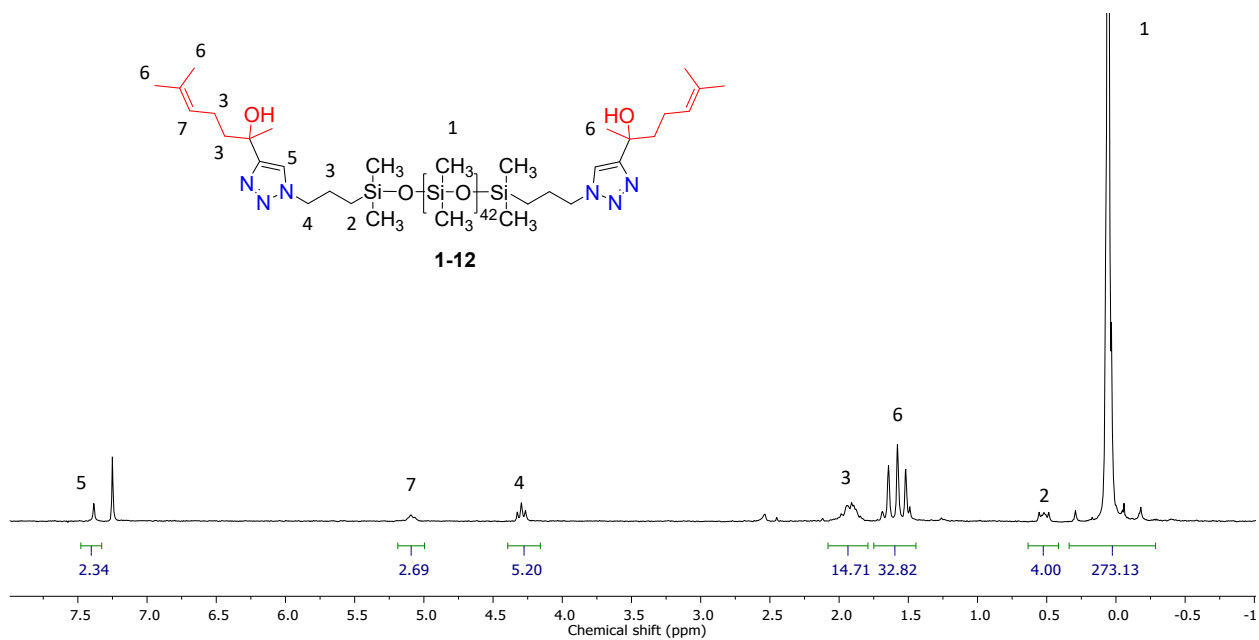

Figure S35. <sup>1</sup>H NMR spectrum of 1-12

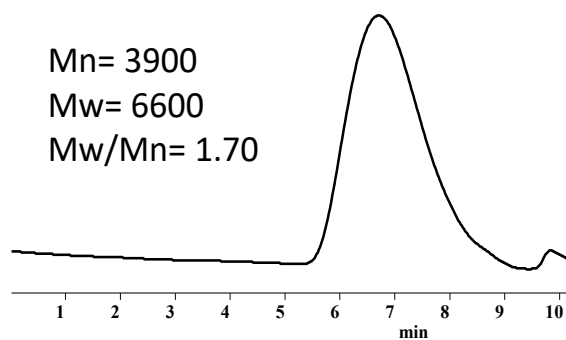

Figure S36. GPC curve of 1-12

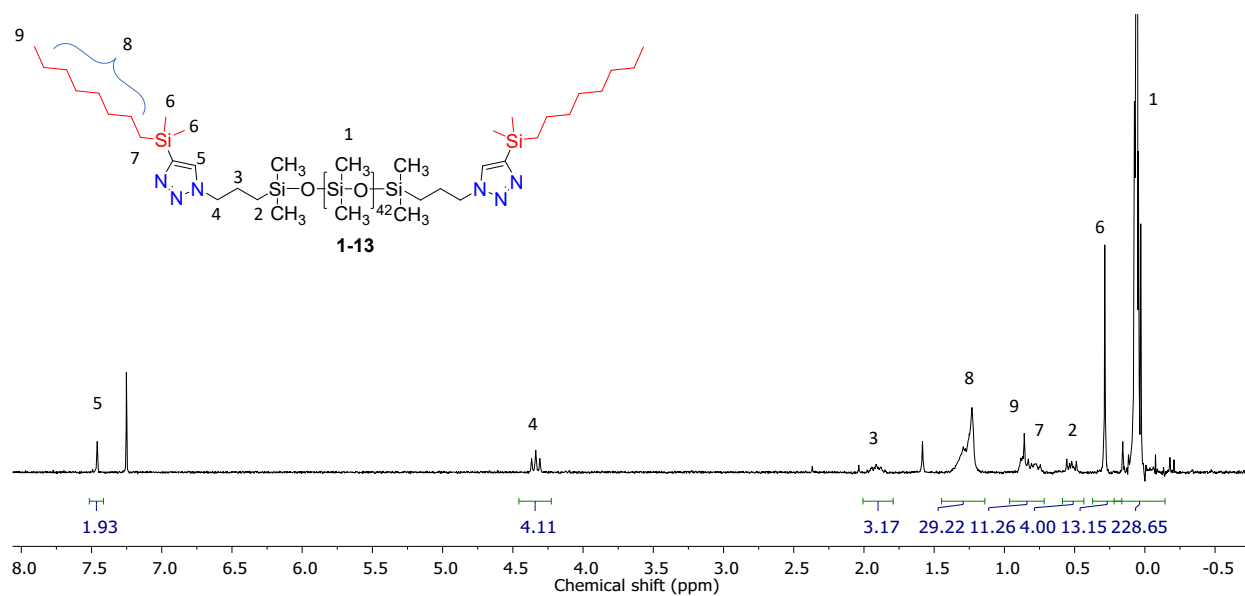

Figure S37. <sup>1</sup>H NMR spectrum of 1-13

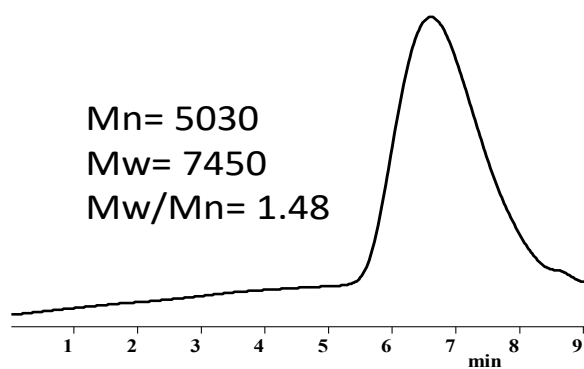

Figure S38. GPC curve of 1-13

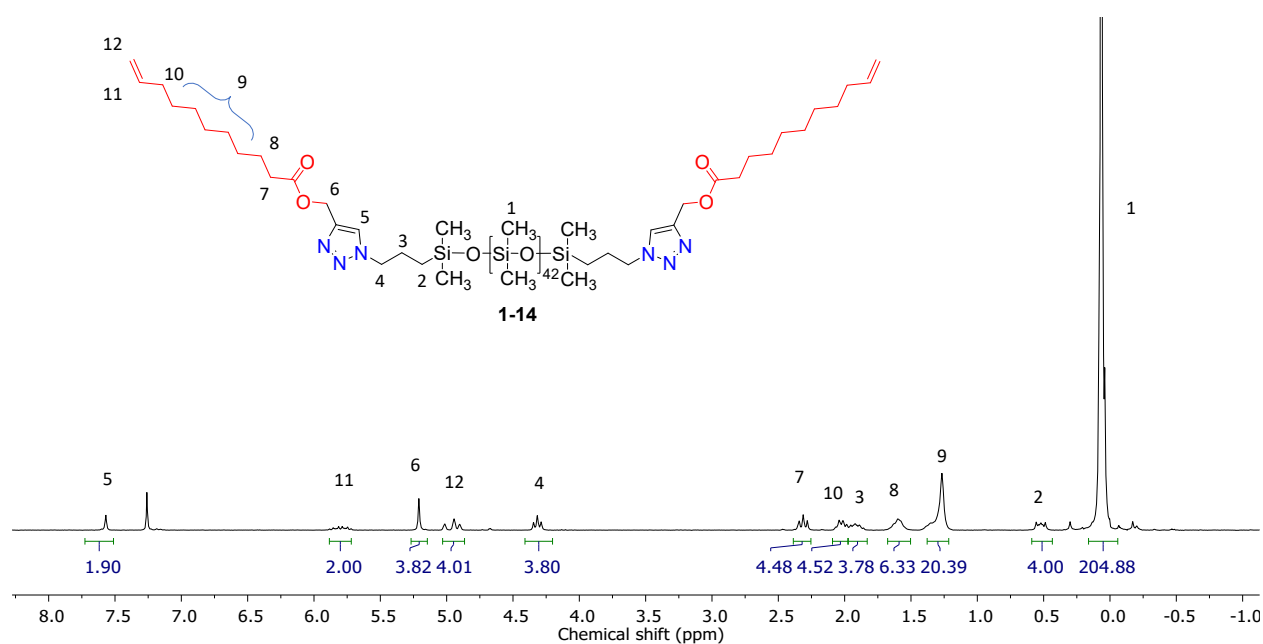

Figure S39. <sup>1</sup>H NMR spectrum of 1-14

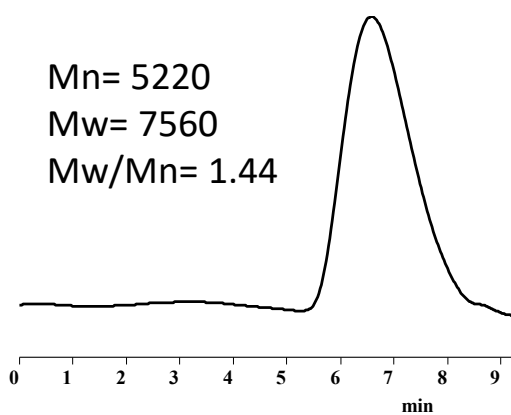

Figure S40. GPC curve of 1-14

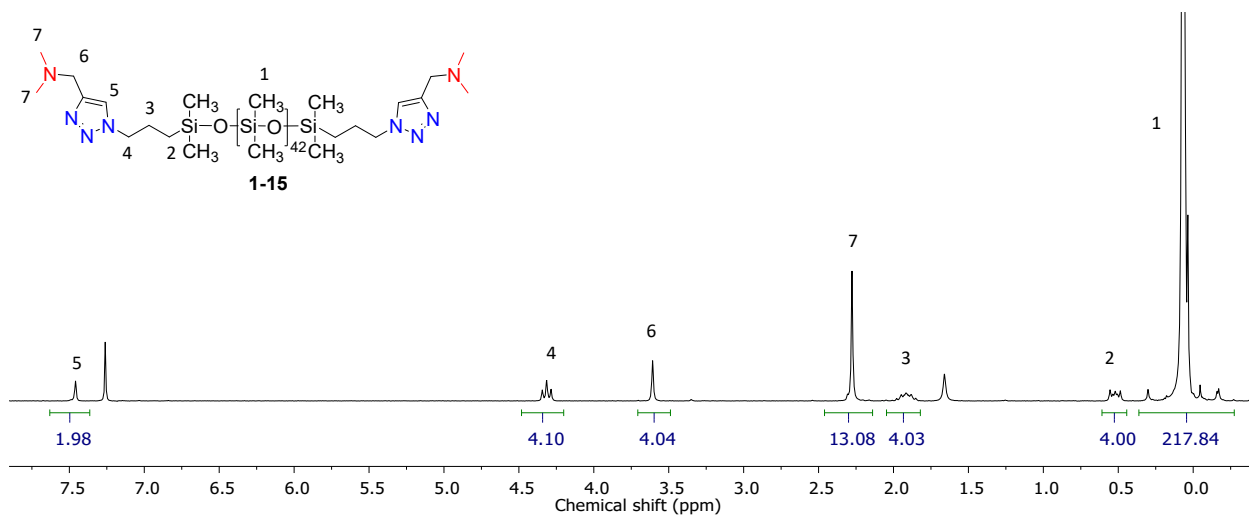

Figure S41. <sup>1</sup>H NMR spectrum of 1-15

## 6. NMR spectra of functional silanes

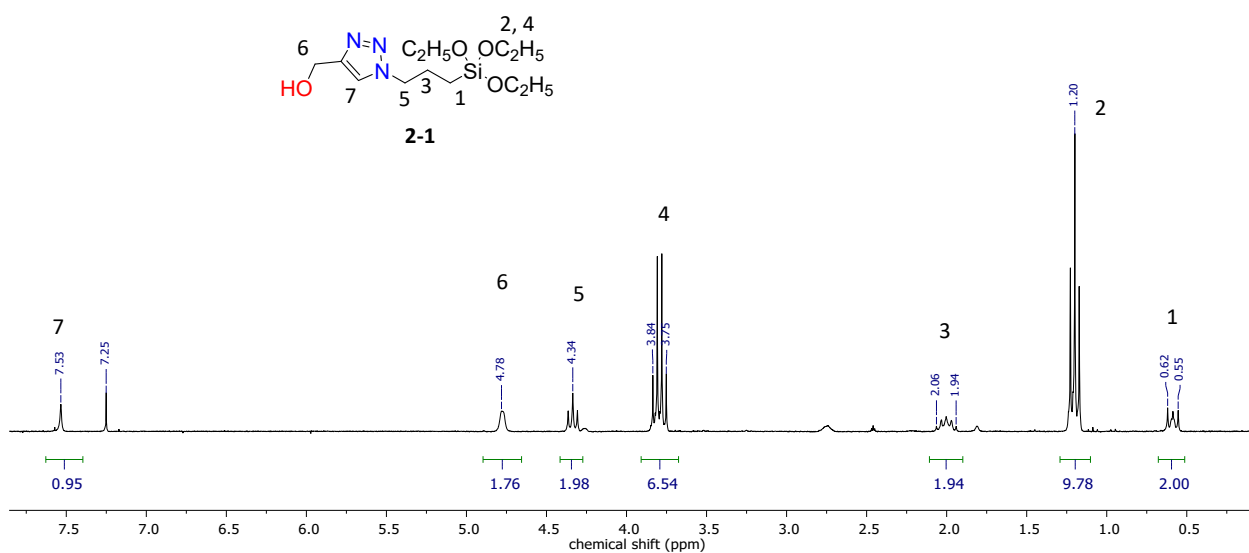

Figure S42. <sup>1</sup>H NMR spectrum of 2-1

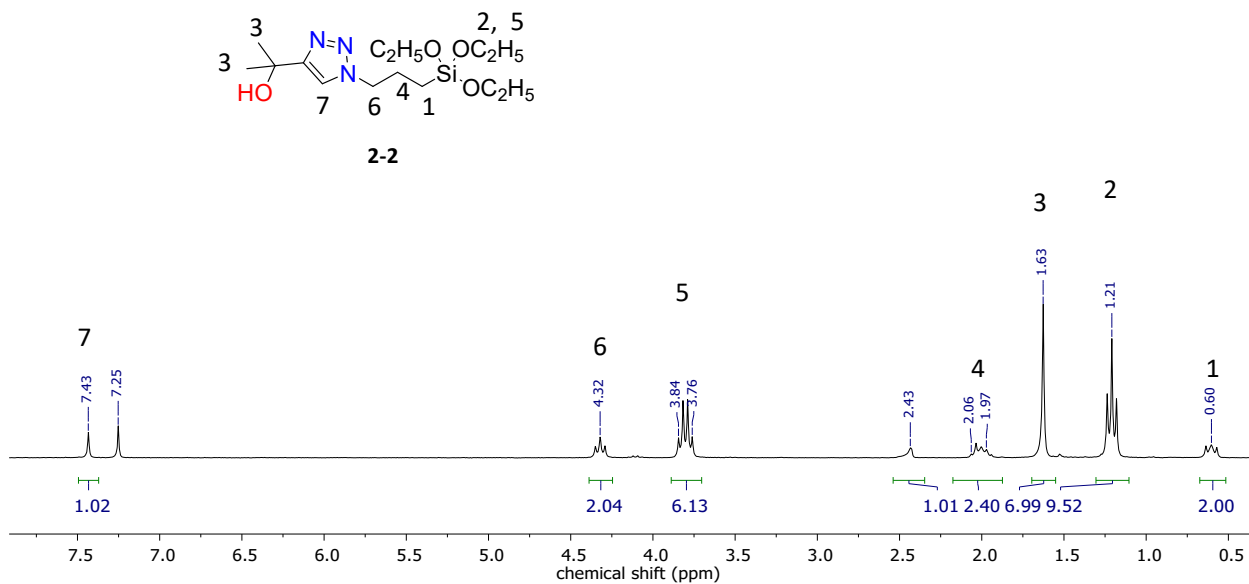

Figure S43. <sup>1</sup>H NMR spectrum of 2-2

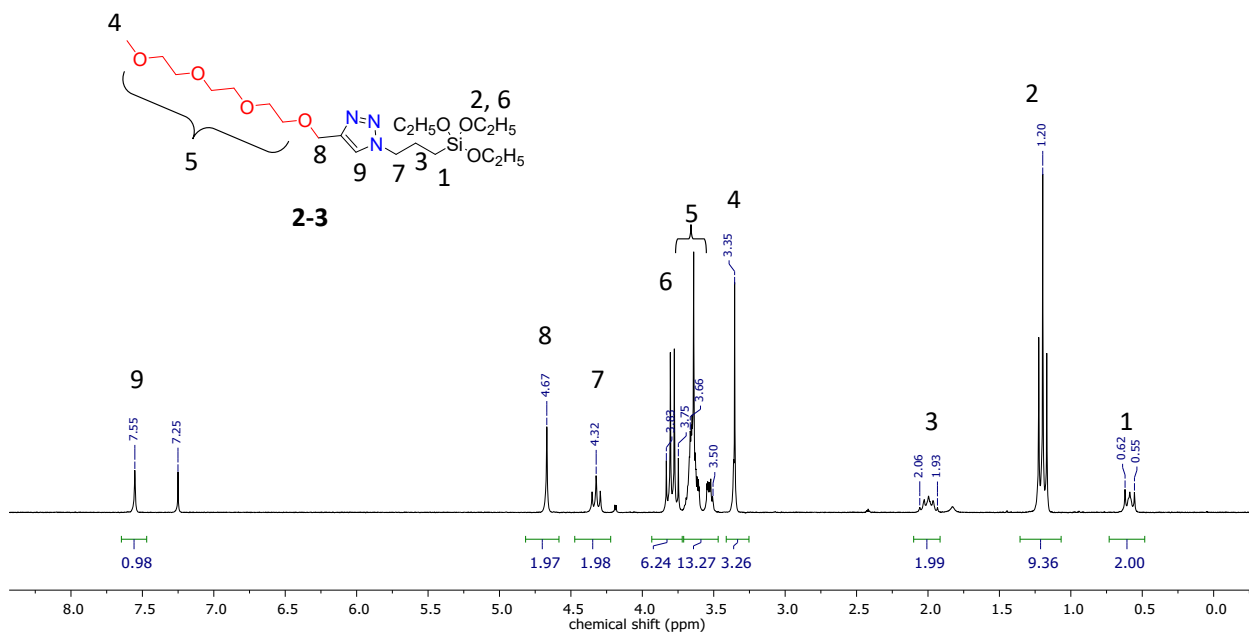

Figure S44. <sup>1</sup>H NMR spectrum of 2-3

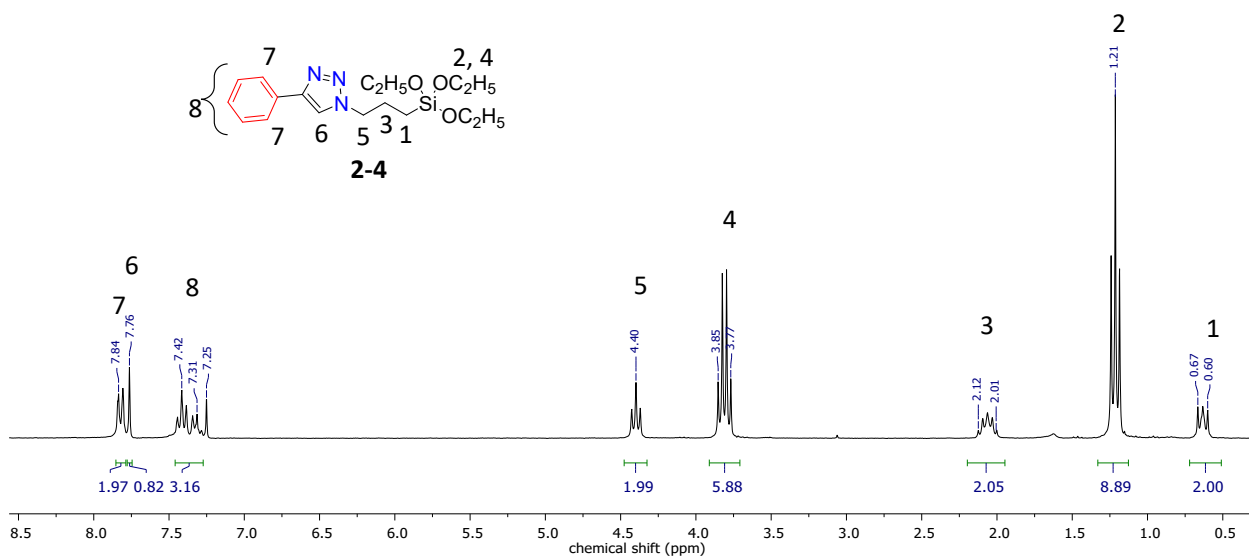

Figure S45.  $^1\text{H}$  NMR spectrum of 2-4

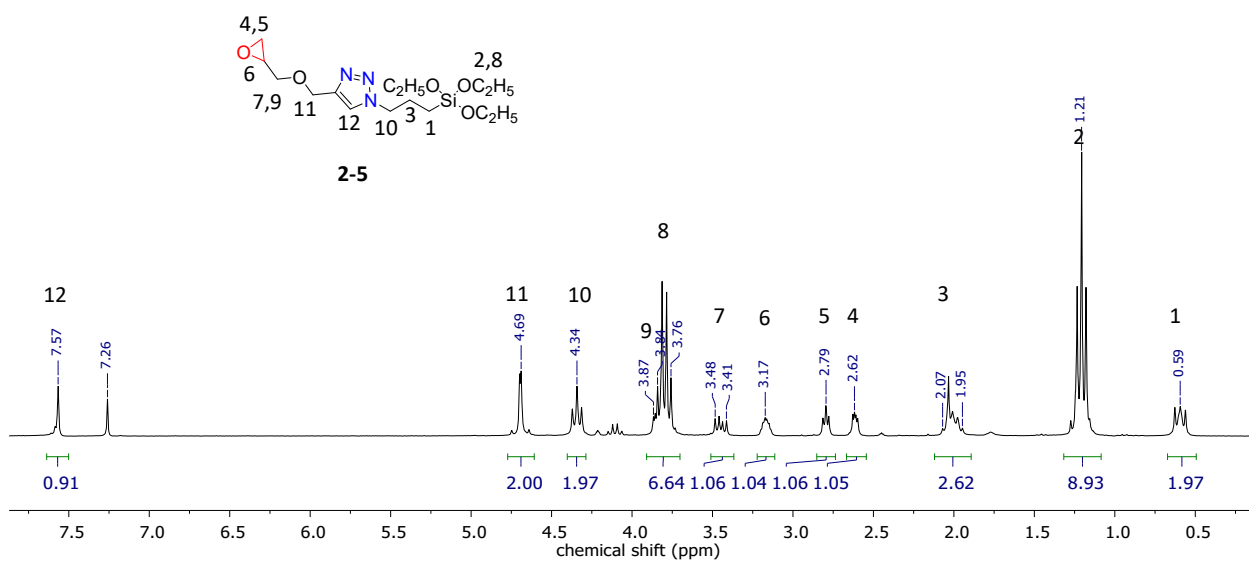

Figure S46.  $^1\text{H}$  NMR spectrum of 2-5

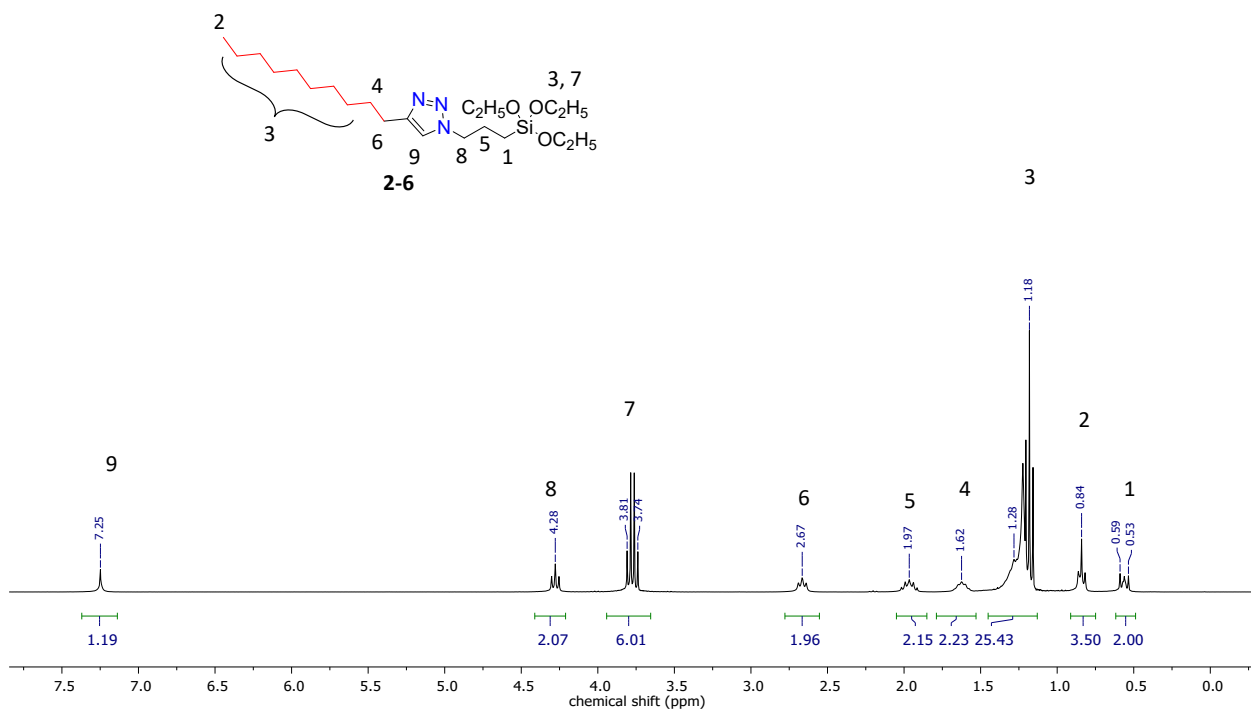

Figure S47. <sup>1</sup>H NMR spectrum of 2-6

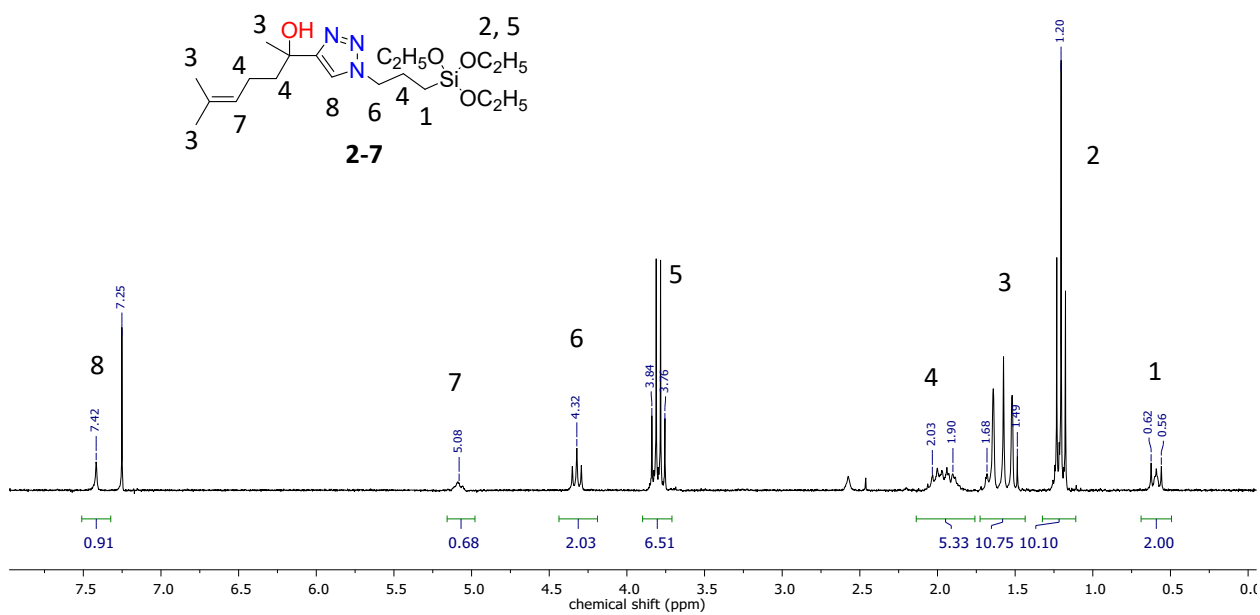

Figure S48. <sup>1</sup>H NMR spectrum of 2-7



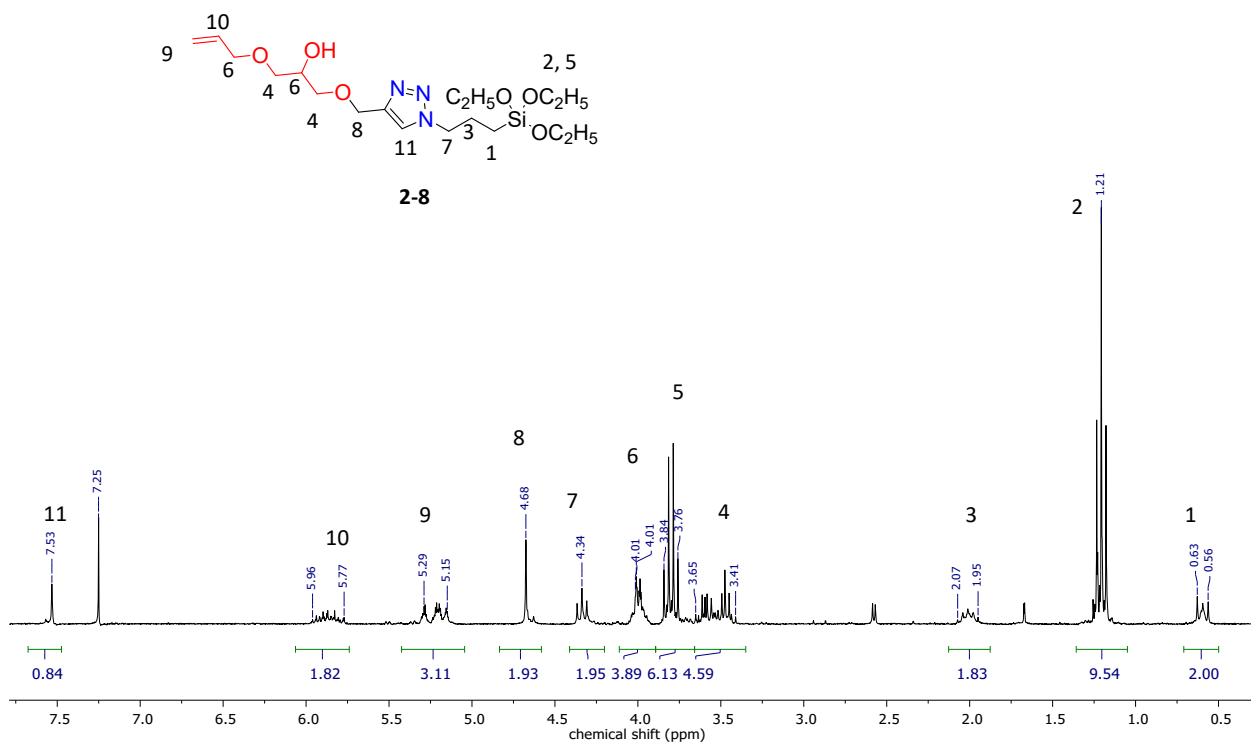

Figure S49. <sup>1</sup>H NMR spectrum of 2-8

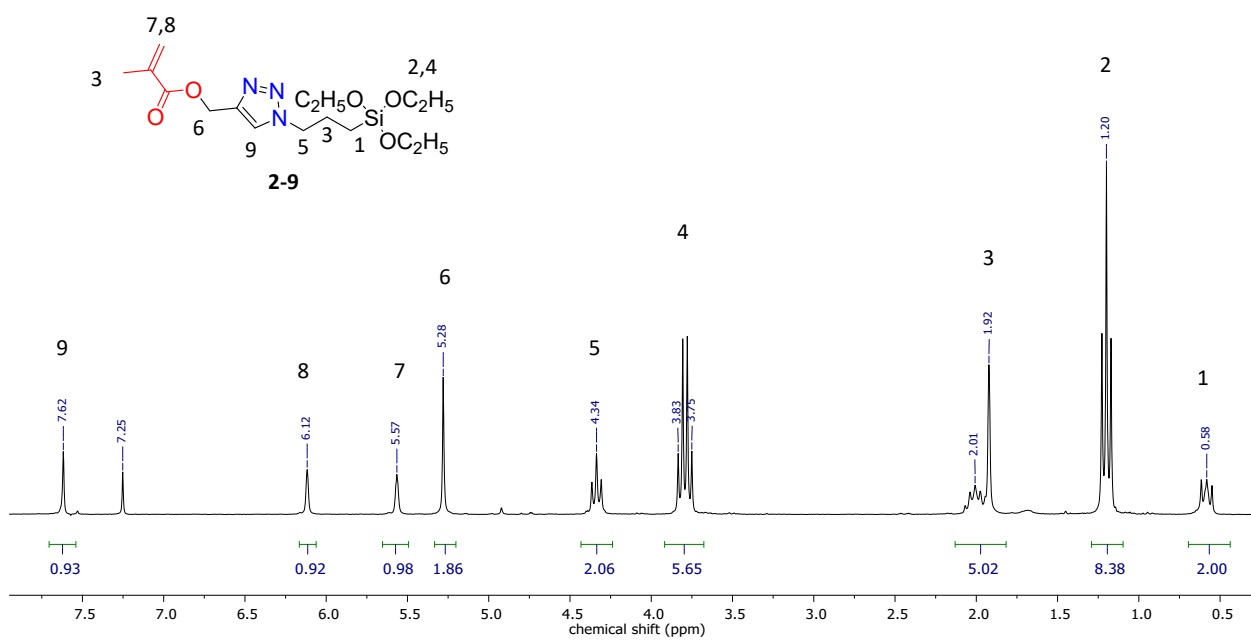

Figure S50. <sup>1</sup>H NMR spectrum of 2-9

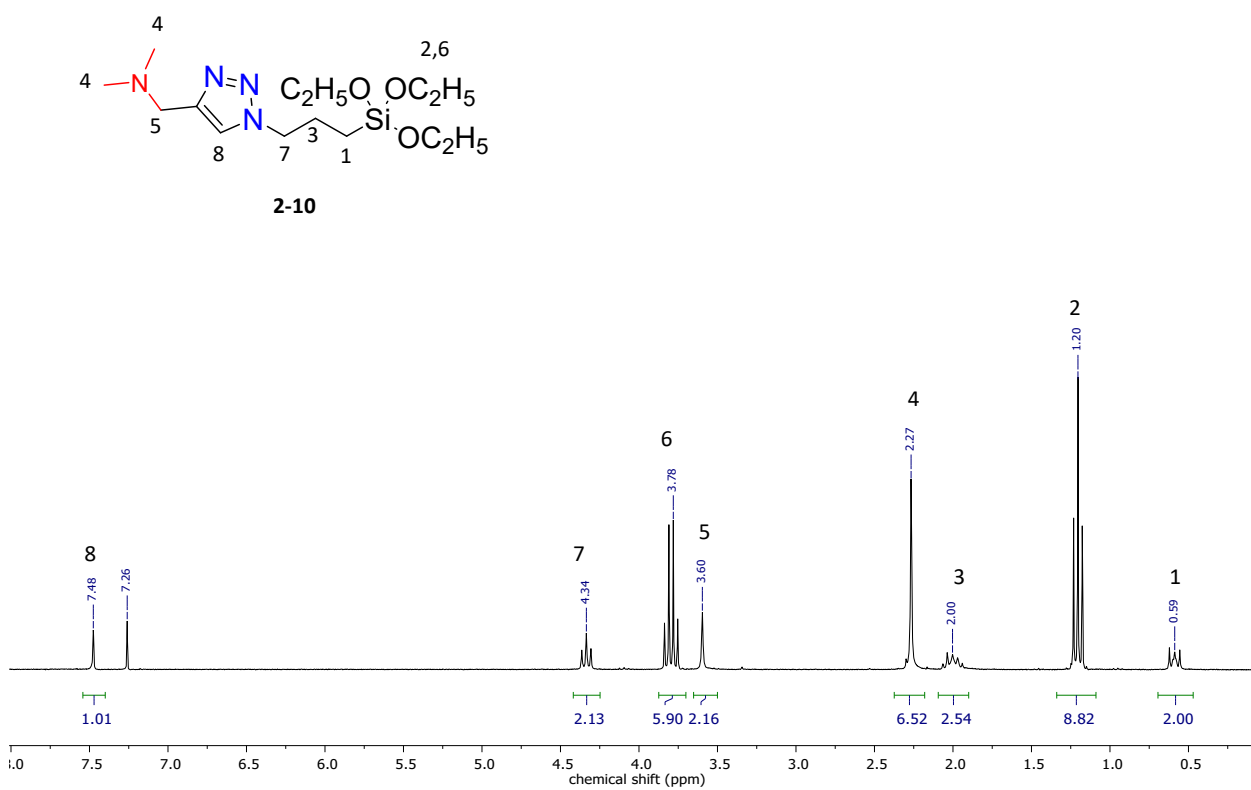

Figure S51.  $^1\text{H}$  NMR spectrum of 2-10

## 7. Preparation of Functional carbosilane dendrimer

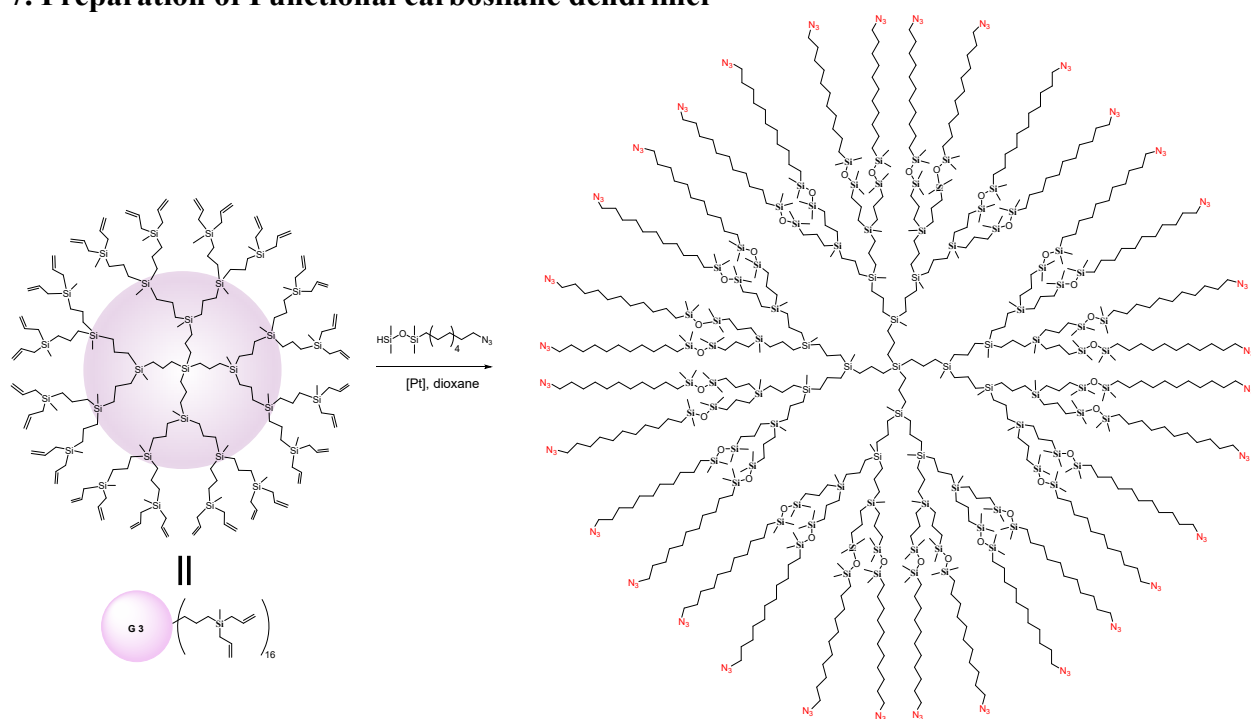

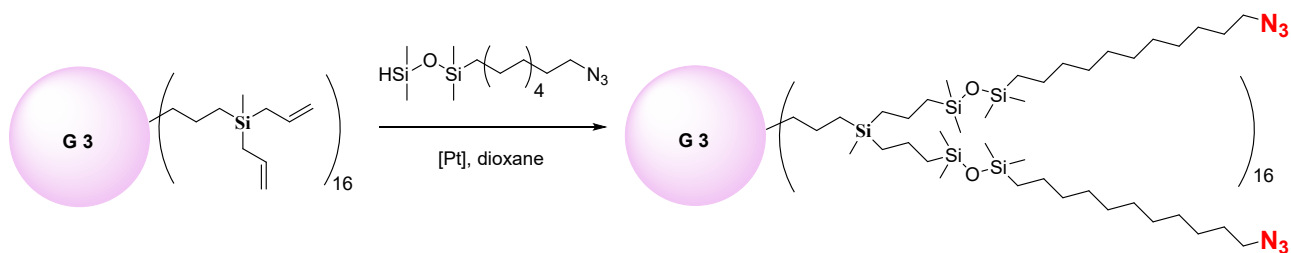

**G<sub>3</sub>Si<sub>93</sub>(N<sub>3</sub>)<sub>32</sub>** The allyl-terminated **carbosilane** dendrimer G<sub>3</sub>Si<sub>29</sub>All<sub>32</sub> (312 mg,  $8.4 \times 10^{-5}$  mol) was dissolved in 5 mL of dry dioxane, then 1-(11-azidoundecyl)-1,1,3,3-tetramethyldisiloxane (0.89 g,  $2.7 \times 10^{-3}$  mol) and Karstedt's catalyst were added to the solution. The obtained mixture was stirred at room temperature for 48 h. The reaction was monitored by <sup>1</sup>H NMR. The reaction mixture was concentrated under reduced pressure (80 °C/0.5 mbar). The product was obtained as a colorless oil with a 99% yield (1.19 g, 99% of purity according to GPC). And then the product was purified on a preparative chromatograph from excess low-molecular compounds with a yield of 80% (0.952 g, 99% of purity according to GPC).

<sup>1</sup>H NMR (300 MHz, CDCl<sub>3</sub>): δ 3.25 (m, 16H, CH<sub>2</sub>-N<sub>3</sub>), 1.64-1.55 (m, 16H, CH<sub>2</sub>-CH<sub>2</sub>-N<sub>3</sub>), 1.36-1.28 (m, 158H, -CH<sub>2</sub>), 0.61-0.48 (m, 76H, Si-CH<sub>2</sub>), 0.03 -0.07 (m, 117H, Si-CH<sub>3</sub>). <sup>13</sup>C NMR (77.5 MHz, CDCl<sub>3</sub>): δ 51.48, 33.48, 33.41, 29.62, 29.53, 29.42, 29.19, 28.86, 26.75, 23.32, 23.26, 19.11, 19.01, 18.54, 18.45, 17.93, 0.56, 0.46, -4.99. <sup>29</sup>Si NMR (59.6 MHz, CDCl<sub>3</sub>): δ 7.19, 6.62, 1.03, 0.86, 0.72.

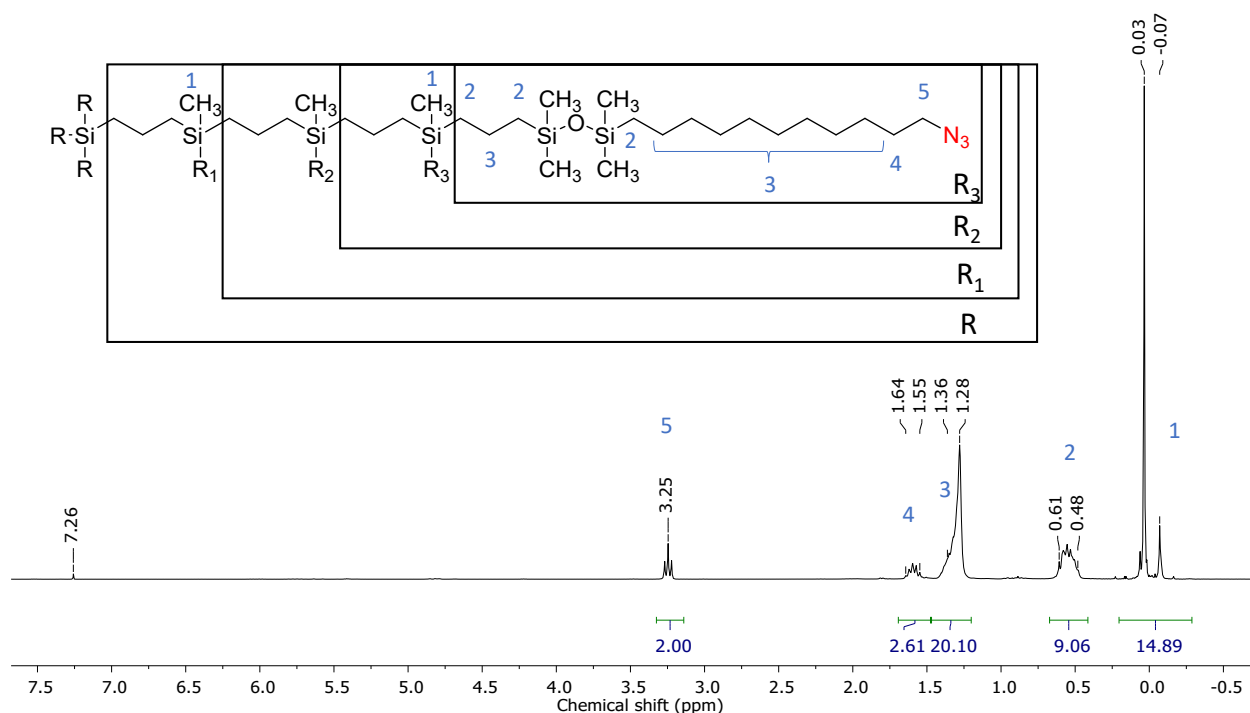

Figure S52.  $^1\text{H}$  NMR spectrum of  $\text{G}_3\text{Si}_9(\text{N}_3)_{32}$

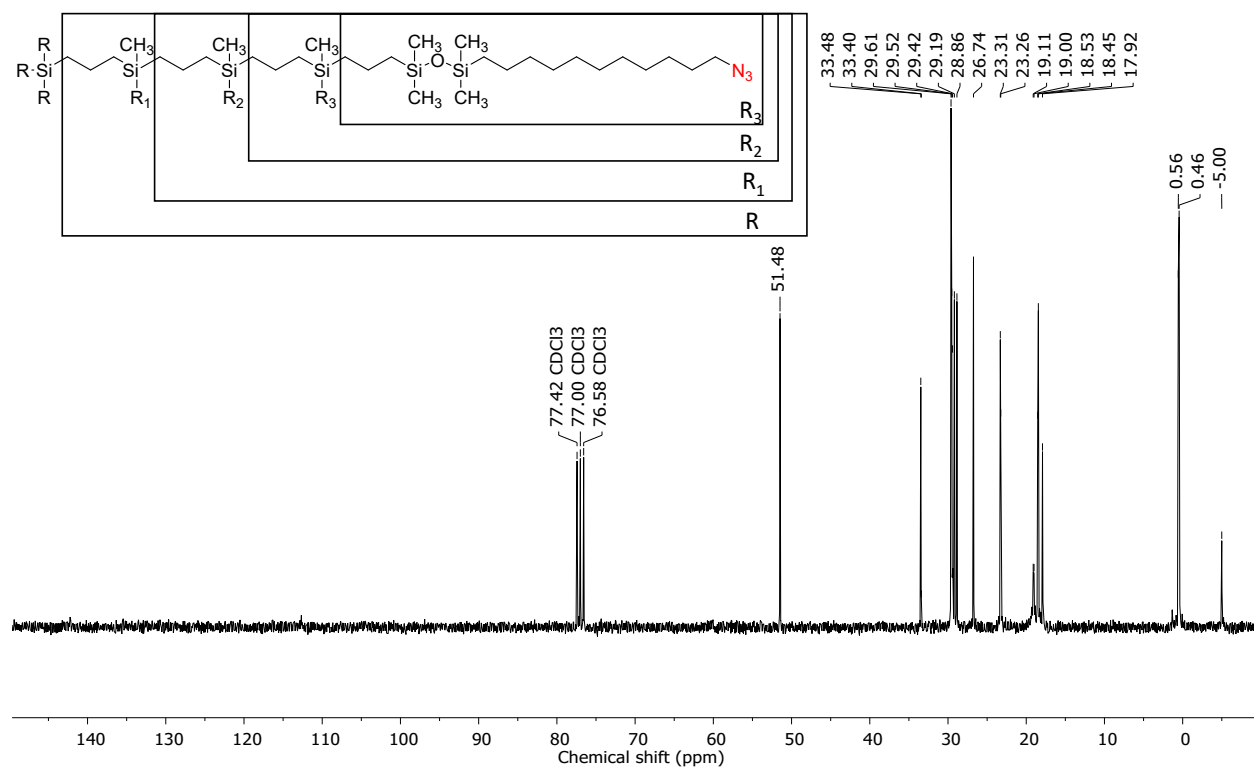

Figure S53.  $^{13}\text{C}$  NMR spectrum of  $\text{G}_3\text{Si}_9(\text{N}_3)_{32}$

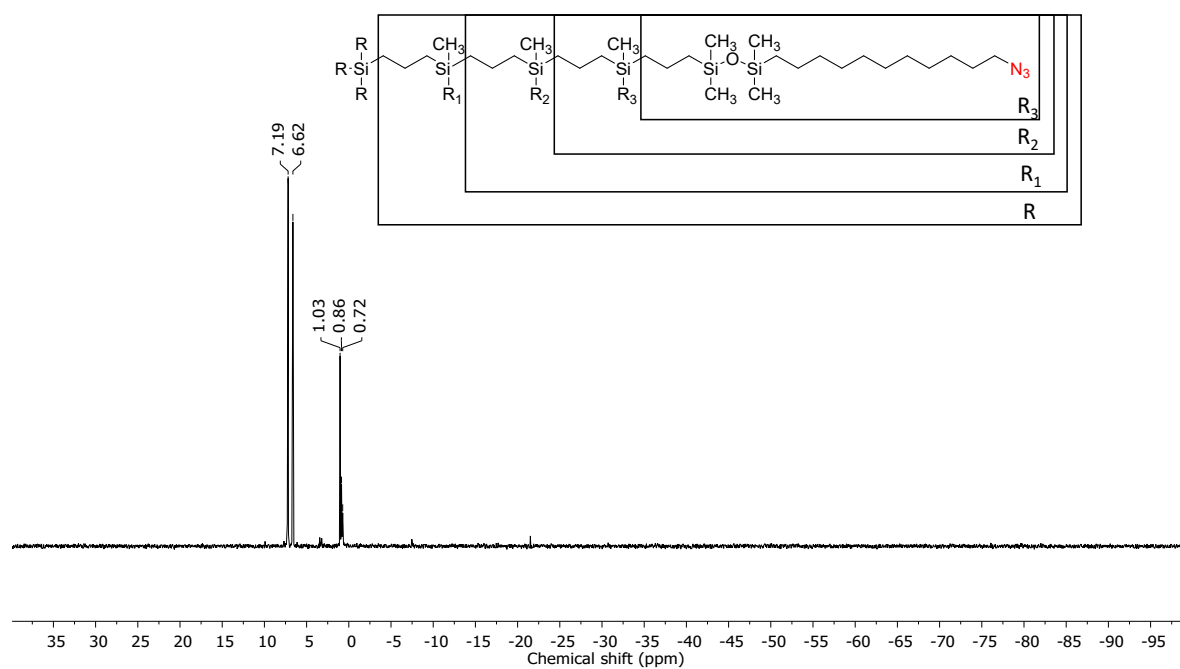

Figure S54.  $^{29}\text{Si}$  NMR spectrum of  $\text{G}_3\text{Si}_9(\text{N}_3)_{32}$

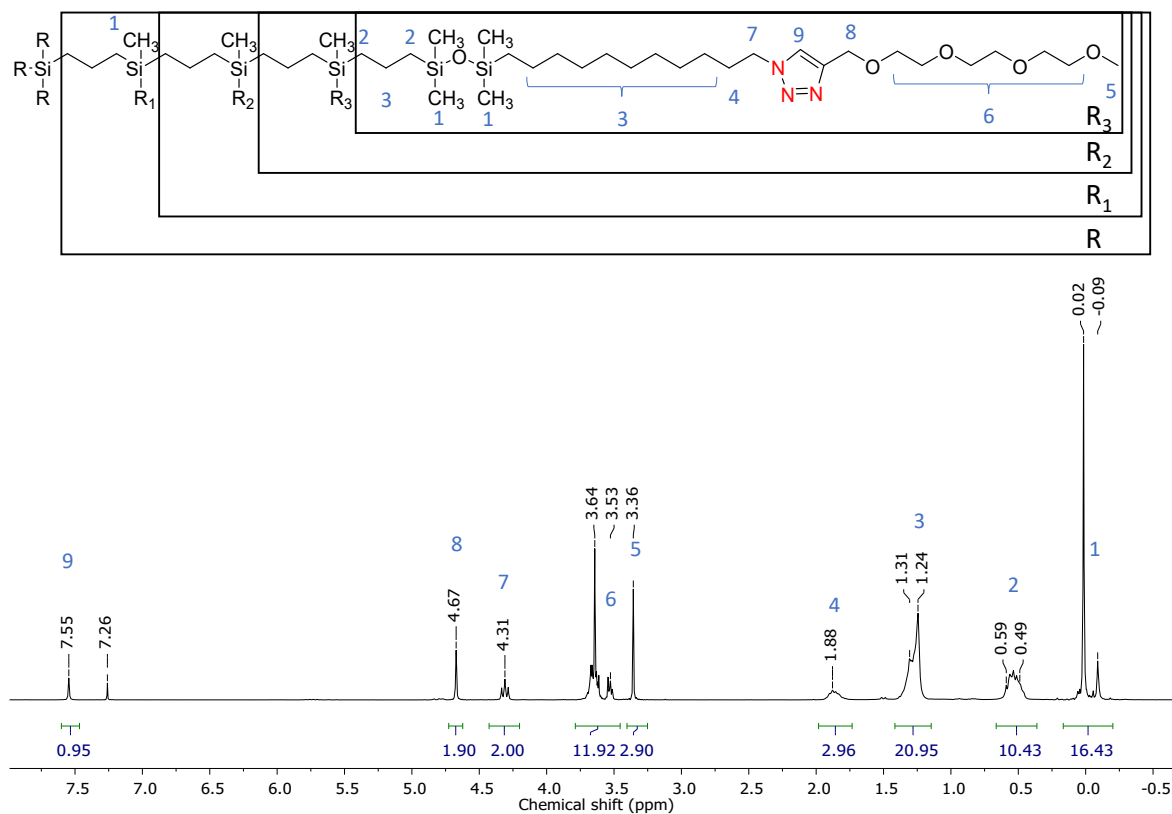

Figure S55.  $^1\text{H}$  NMR spectrum of  $\text{G}_3\text{Si}_9(\text{TEG})_{32}$  (3-1)

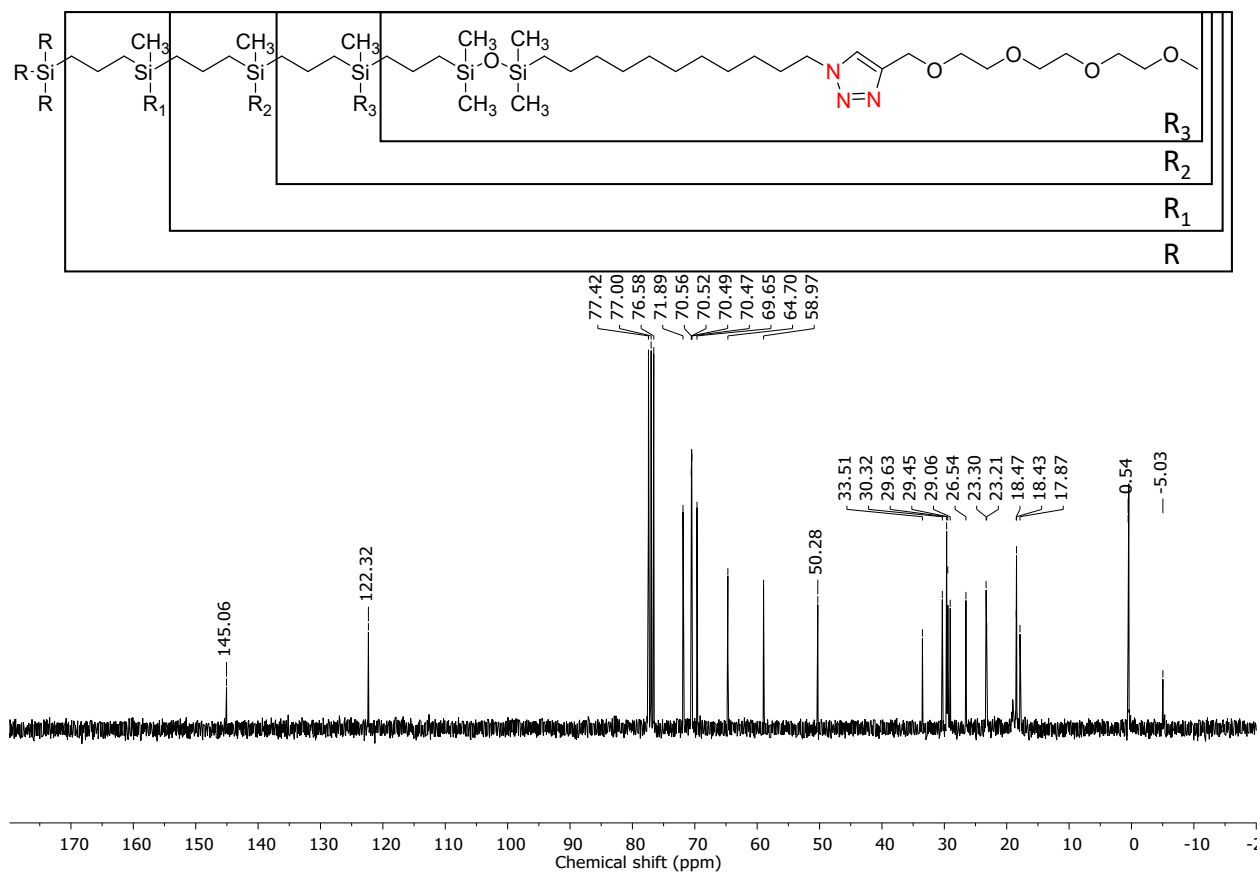

Figure S56.  $^{13}\text{C}$  NMR spectrum of  $\text{G}_3\text{Si}_{193}(\text{TEG})_{32}$  (3-1)

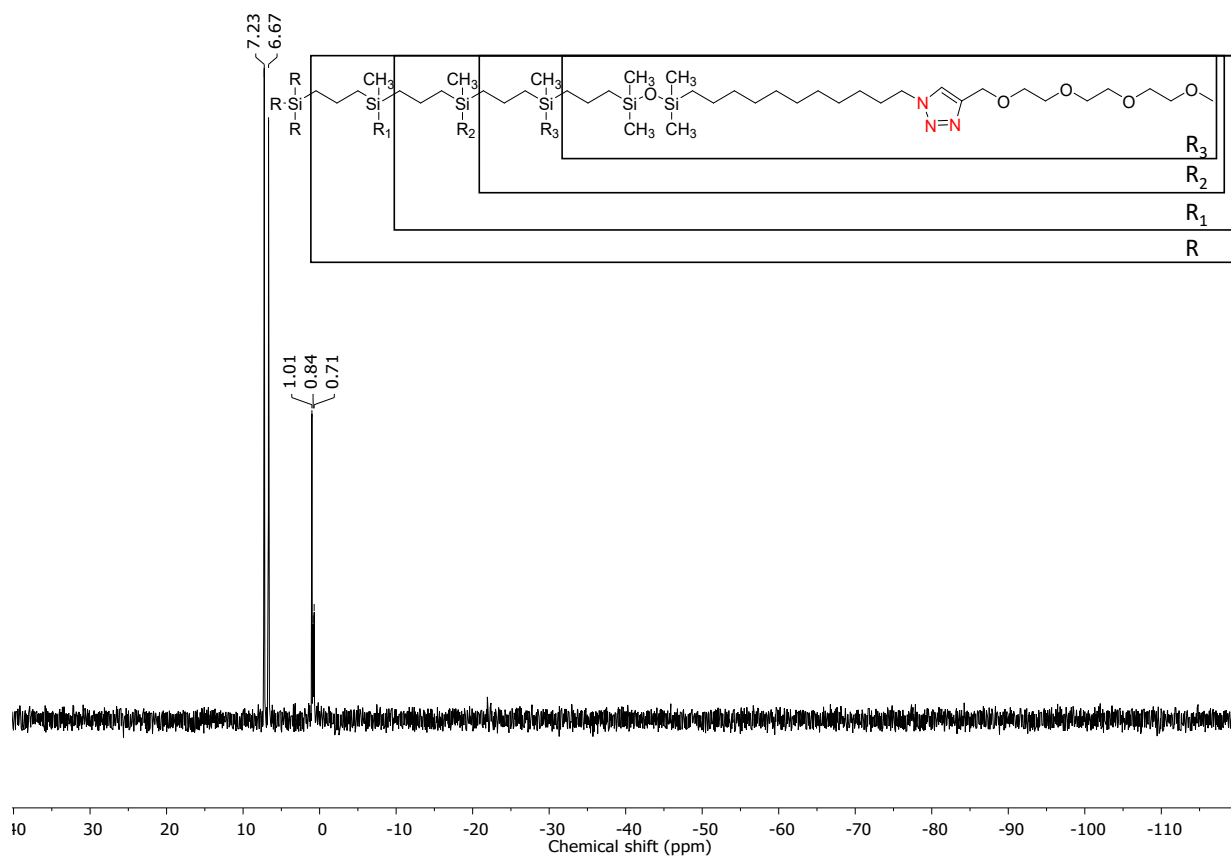

Figure S57.  $^{29}\text{Si}$  NMR spectrum of  $\text{G}_3\text{Si}_{193}(\text{TEG})_{32}$  (3-1)

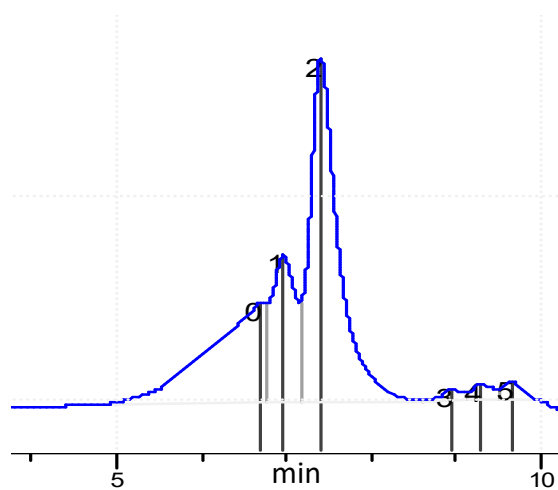

Figure S58. GPC of  $\text{G}_3\text{Si}_{193}(\text{TEG})_{32}$  (3-1) before purification on a preparative chromatograph

## 8. Cell culture and cytotoxicity assay

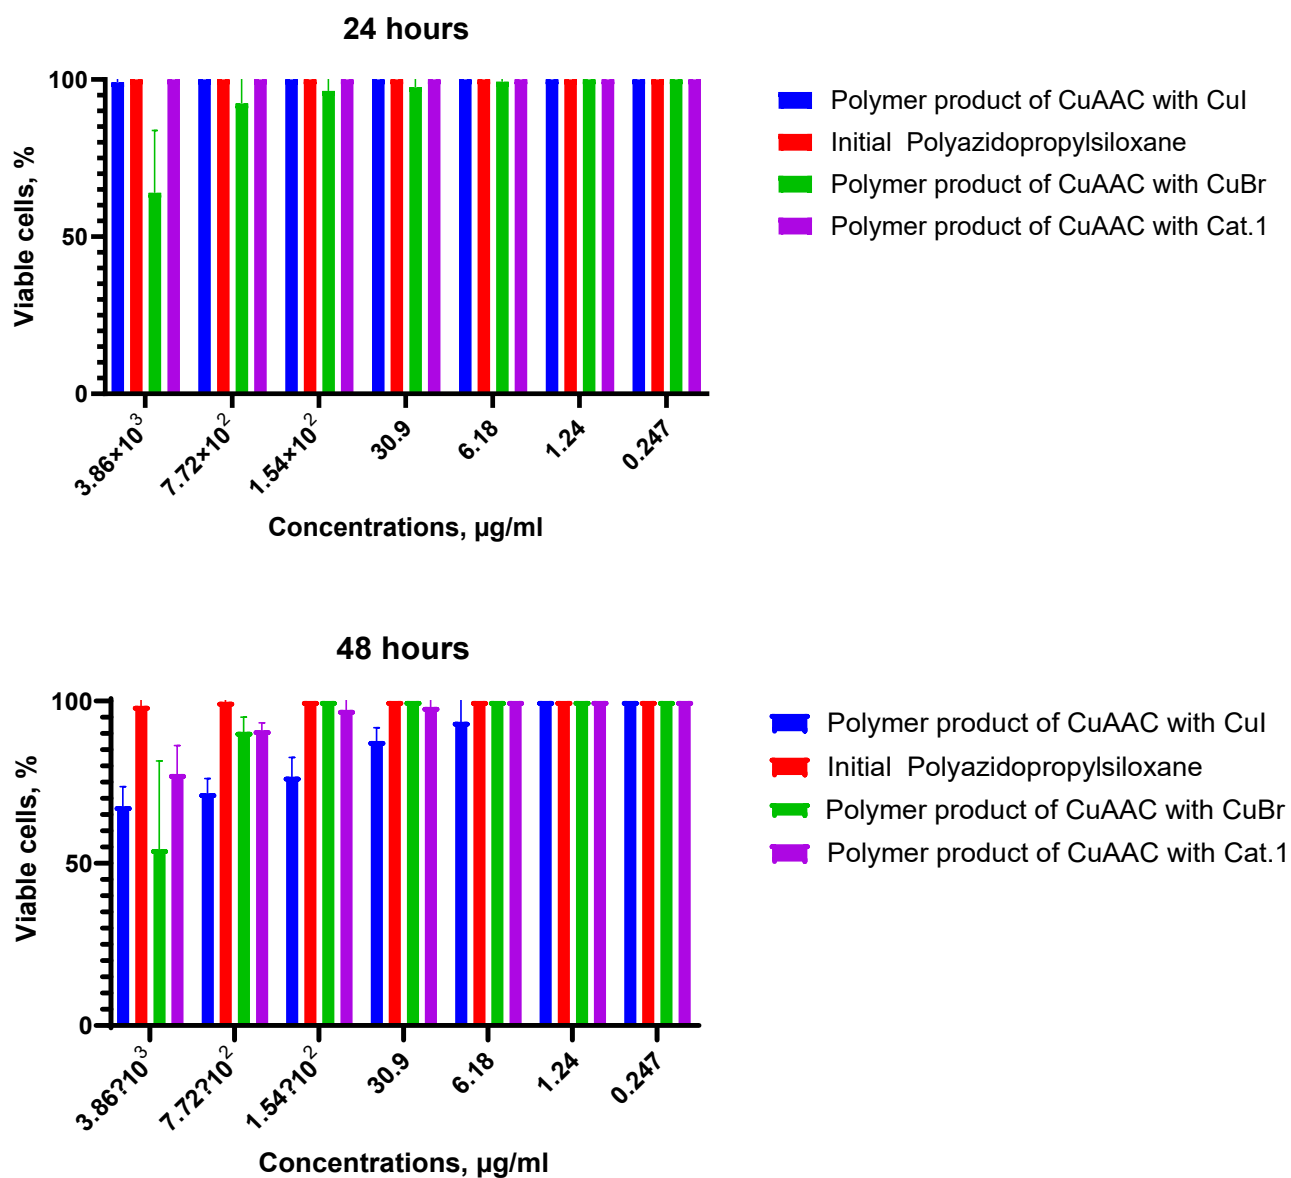

Figure S59. Induced cell death by the components.

## 9. References

- 1 D. Migulin, S. Milenin, G. Cherkaev, E. Svidchenko, N. Surin and A. Muzafarov, *J Organomet Chem*, 2018, **859**, 24–32.
- 2 D. A. Migulin, J. V. Rozanova, V. A. Migulin, G. V. Cherkaev, I. B. Meshkov, A. A. Zezin and A. M. Muzafarov, *Soft Matter*, 2022, **18**, 2441–2451.
